# Supplementary material
Source: PubMed Central journal article supplement (PMC5289850)
Supplement: 761FigureS6.pdf [file 761FigureS6.pdf]

**Figure S6: foraging transcript sequences:**

>RA

```
AGTCTGTGGAATTTCTCGTGGTGTGCGGTTGTGCTGCGGATCGTGCTTGAATGACTTTAGCGGCATTTTTATAAGAATCAATGCAACGGC
TGTTTCTCGCAAAATTTGGCACAAGTTCTTAATAAAAAGAAAAAATATATATATATGGCATTGGCGTTTATCACATAATCCACATCGCCAT
TTAGTTCGGCGGTTTTTCATCGACTTGTGCTTGTGTGCGTGCCTTGAACGCAACGCAAGTGGAAAGACTCGAGAAAACAAAAGTGCAGGCCG
TCTAAATTTGATGGCGAAGTTTCGTGTGCCGCTGCATTTCAATTTATAAATATATTTTCGGCCTTAATCTGTGCTTCTGTGAATTAACGAGGAAAC
TGAAGAGTGCAGCGGAGCGAGACGCGATCACAAATCAACAAGTGGAAACGAAAGAACTTTCTCGCAAAAGCCGGCTGATCGCAACAACAAGAA
AAGAGAGCGATTTCTGCGACTGGAACCATAACATTTACATCGCCCCGGAATTTCTTCACTTTTCGTCACACATGGCACCCAACGCTGGCTGATT
GAGTTTTCCGTGGCGGCTGTTGATCAGGAAAGCCGCTGGATGCGTTTCTGCTTTGATCGGCTGTGCTTCGCAACCAAGCGGCCAGCCAAAACCTCC
AACAGCAATGCACCACACAGCAGCACCCTGTAGATGCACCACCAGTCCAGCGGATGTAGATGTAGCCACTGTACCAGTAGCAACAACAGCACCAC
CACCACAACAGCCAGTTAGTAATCTGTCTATGCCGACTACCAGAAGCTGCAGCCGCGATAATCGATCGGGACTGGGAGCGGGACAGAGATACAGA
TACAGATACCAGGAGCGAGGCCAAGCCACCGGACATTTGGAGCACATAGAACCCTGAGAGGAGCAGAGACAGATACACACACAGATACAGTCGCGG
GCAGAGATACAGATACAGATACCCCGACGCCCTGCCCCATCGATACAGATACAGATACAGCAGCGCTATCGCCGCGACAGCAGTCCGGAAGATC
GCAATCTGAACACGAGGCGAAACGATTCGAATATTACGGAGGCGTTACGAAAGCAGCCAGTATGCAGCAGGAGCCGAAACGCAACTATCAGTTCCC
AACCGACTTGGGCTGGTGGATCTGTCAACAATAATAAACAACAACGCACTGGCAGTCCAAATAGCGGCAACCAACAACAGCAATATC
AACAAATACTGGTGGGTGGCATTGTGACCTTGGCGGCGGCTGGTGGTCTCATAGGCTGGAGCATAACGCGTGGGCTGGGCTGGGACTGATACCAGCAC
CGCTACCCTCGGATGTGCTGACCCACACGCTGATCTATGGCACACCGCCCTCGGGCGCCAGCAATTGAACCAGGATCCCGGAAGCCTTCTGCA
CCAACAGGAGCTGCAGCTACAGCAGCGCTATCAGCAATTCAGCAGCTTCAGGCGCAGACGCGAGGCGCTGTACACCAGCCAAGGAAGTCCGGTGTG
TATCACCACCCAGTCCGGTCAAGTCAACCGTGGCCATACCCGGAGCCACTGGCATTGCCATTGCCCCACGCAACTGCAGCCGCCAACACGCTGAACC
TGCAGCAGCAGATGCAGAGTCTGCGGATCTCGGGATGCACGCCAGCGGTACGGTGGCTCGGCCACGCCCTCGCCGTTGGGCTGGTGGATCCGAA
TTTCATAGTACAGCAACTATGTGGCCGCTCGCCGACAGGAGTGTCTCATTAGATCATTAGGCCAAGGAGCTCAAGATACAGGAAATGCAAAAG
GCCTCCAGTTCAAGGACAACGAAATAGCCGAGCTAAAGTCCGACTTGGACAAATCCAGAGTGTCTTCCCTTACGCGTGGCAGTGGCGCCGGTT
GTGCGGGCAGCGGCGGAGCTGCGGATCTGGAGCTGGCGGAAGTGGTGGCAGTGGTCCGCGCACCGCCACAGGTGCCACACGCAAGTCCGGTCAAG
TTTCCAGAGGCGAGGGCATTGGGTATCTCGCCGAGCCACAGAGCGAGTCTCGCTGCTCCTCGAGCACGTCAGCTTTCCAAATACGACAAGGAT
GAGCGCTCCCGTGAACCTTATCAAGGCTGCCATATTGGATAATGATTTTCAATGAAGAATCTGGATCTGACGCAGATCCCGGAGATCGTTGACTGCATGT
ATCCGGTTAAGTATCCAGCCAAGAATCTGATCATCAAGGAGGAGATGTGGAAAGCATCGTTTATGTATGGAAGATGGACCGTGGAGGTTTCCCG
CGAGGGCAAGTACCTCTCCACATTTGTGCGGAGCGAAGGTCCTTGGCGAATTGGCGACTCTGTACAACTGCCAGCGGACGCGACCATCACCAGGATC
ACCGAGTGAACCTGTGGCCATCGAGCGCCAGTGTCTCCAGACCATCATGATGCGAACGGGCTGATCCGGCAGGGGAATACAGCGATTTCCCTCA
AGAGTGTGCCATCTTTAAAGACTTGGCGGAAGACACGCTCATCAAAATCTCCGATGTCTTGGAGGAGACGCACTACCAGCGTGGCGACTACATAGT
CGCCAGGGCGCCGAGGCGATACCTTCTTATCATCTCCAAGGGAAAAGTGGAGTACGATCAAGCAGCAGGACACGCAAGGAGGAGAAGTTTCAAT
CGATCTGGGCAAGGGGATTTCTTGGAGAGAAGGCTCTCCAGGGCGATGATCGCCAGCGCAATATTATTTGGAGTCCCGGATGGGCTGCGGCTCA
GTTGTCTGGTCTCGATCGCAGGACTTCAATCAGCTAATTTCCAATCTGGACGAGATCAAGCATCGCTACGACAGGGCGGACATGGAACCGCAG
AAAGATCAACGAGGAATTCGGGACATCAACCTCACAGATCTCGGTGTATCGCAACCTTGGAGTTGGAGGTTTCGGTCCGCTAGAGCTGGTCCAA
ACCAATGGAGATAGTCCAGGTCCTTTGCCCTCAAGCAGATGAAAAAGTCAAGATCTGGAGACGCGTACGAGCAACACATCATGTCCGAGAAGG
AGATCATGGGCGAGGCCAATGGCAGTTCATCTGAGCTGTTCAAGACCTTCAAGACAAGAAGTACCTGTACATGTAATGGAGAGTTGCCCTGGG
TGGAGAGCTCTGGACGATTTACGGGACAAGGCAACTTCAGCAGCAGCACCACCGCTTCTACACGGCATGTGGTGGGAGGCTTTGATTATTG
CACTCGGTAACATCATCTACCAGGATCTTAAAGCCGAGAACCTGCTGCTCAATGAACGGGGATATGTGAAGCTGGTGGACTTTGGCTTTGCCAAGA
AGCTGCAGACGGGCGAGGAAGCATCGACTTTCTGCGGCACTCCAGATACGTTGCTCCCGAGGTGATTTCAACCGGGGCCACGACATCAGTCCGGA
TTACTGGTCTGGGAGTGTCTATGTTGAGCTGCTTACTGGTACCCTCCATTCACGGGCTCGGATCCCATTGCGCACCTACACATATATACATTAAG
GGCATCGACGCCATCGAATTTCCCAAGGAATATCACCCGCAATGCCAGCAGCAGCTGCAATCGAAGAGCTTCCACAAAAAACAAGAAACGTAAGCA
GTCGCAAGGTCAGGGCCGACACAAAAGCACAATCATCCATCGTCTGATGCTTCAATTTGAGATTTATAGATACGCTCTCCGTGATGTTATAACCATGAT
GTCAACGCAATGAATTTATTAACGAGTTTATAACTATATTTTATAATGAGGATATATGTGCTAGTTCGCTTGGAAATGATGTAATTTGTAAGTA
GGTCTGTGACTCTGTTTCAGAGCTCTGTTAGCCATGTGCATTTGATAAATTCAGCTATTTGTATCTATTAATAATTTTTAACATAATTTATACAT
CATTTGTTAAAGCATAACAATCCGGTTGCGCTTATAGTCTGTAAGAGAACAATTTGAAAGCAACATTTGACCAAGATCTCCGCTCACACATTTCTTAAAA
TTCTATGTGGCTCTCTACTGTCTTTCATTAGTCTTAGCGATCATGTCTATTTATATGTACGAATAACATGCCCTTTTAATTTGCTTTTTTAAGTAA
TCAGTAGAAATGAATAACAATTTGATCCGAT
```

>RB

```
AGTTCACCAACCGACTTGGGTCTGGTGGAGCATCGTCAACAATAATAAACAACAACCCATCCGAGTGGATCCAATAGCGGCAGCAACAACAACAG
CAATATCAACAATAATCTGGTGGGTGGCATTGTGACCTTCCGCGCGGCTGGTGGTCTCATAGGTCTGGAGCATACGGGCTCGGGTCTGCGACTGATA
CCAGCACCGCCTACCCACTCGGATGTGCTGACCACACGCTGATCTATGGCACACCGCCCTCGGGCGCCAGCAATGAAACCAGGATCCCGAAGCC
TTCTGCACCAACAGGAGTGCAGCTACAGCAGCGCTATCAGCAATTCAGCAGCTTCAGGCGCAGACGAGGCGCTGTACACCAGCCAAGGAAGTCC
GGTGTGTATACCAACCCAGTCCGGATCGAGTCAACCGGTGGCCATACCCGGAGCCACTTGCATTCGCCACGCAACTGCAGCCGCCAACACG
CTGAACCTGCAGCAGGATGCAGAGTCTCGGATCTCGGGATGCACGCCAGCGGATCCGGTGGCTCGGCGACGCCCTCGCGGTGGCCCTGGTGG
ATCCGAATTTTATAGTACGCAACTATGTGGCCGCTCGCCGACAGGAGGAGTGTCTCATTAGATCATTAGGCCAAGGAGCTCAAGATACAGGAAAT
GCAAGGGCCCTCCAGTTCAGGACAACGAAATAGCCGAGCTAAAGTGCACCTTGGACAAATTCAGAGTGTCTTTCCCTTACGCCGTTGGCAGTGGC
GCCGGTTGTGCGGGCACGGGCGGAGCGTCCGGATCTGGAGCTGGCGGAAGTGGTGGCAGTGGTCCCGGCACCGCCACAGGTGCCACGCAAGTCCGG
GTACAGATTTCCAGAGGATGGGTATCTCCCGGATCGGGATGCACAGAGCGGATCCCGGCTCGGCGACGCCCTCGCGGTGGCCCTGGTGG
CAAGGATGAGCGCTCCCGTGAACCTTATCAAGGCTGCCATATTGGATAAATGATTTTCAATGAAGAATCTGGATCTGACGCAGATCCGCGAGATCGTTGAC
TGATGTATCCGGTTAAGTATCCAGCCAAGAACTGTATCATCAAGGAGGAGATGTCCGAAGCATCGTTTATGTATGGAAGATGGACGCGTGGAGG
TTCCCGCGAGGGCAAGTACCTCTCCACATTTGCGGGAGCGAAGGTCCTTGGCGAATTTGGCGATCCTGTACAACTGCCAGCGGACGGCGACCATCAC
CGGATCACCGAGTGCAACCTGTGGCCATCGAGCGCCAGTGTCTCCAGACCATCATGATGCGAACGGGCTGATCCGGCAGGCGGAATACAGCGAT
```

TTCTCAAGAGTGTGCCATCTTTAAAGACCTGGCGGAAGACAGCTCATCAAAATCTCCGATGTCTTGGAGGAGACGCACTACCAGCGTGGCGACT  
ACATAGTGCAGGCGCCGAGGCGGATACCTTCTTTCATCATCTCCAAGGGAAAAGTGCAGATGACGATCAAGCAGCAGGACACGAGGAGGAGAA  
GTTTCATTCGCATGCTGGGCAAAGGGGATTTCTTTGGAGAGAAGGCTCTCCAGGGCGATGATCTGCGCACGGCGAATATATTTGCGATCCGCGGAT  
GGCGTCAGTTGTCTGGTTCATCGATCGCGAGACCTTCAATCAGTAATTTCCAATCTGGACGAGATCAAGCATCGCTACGACGACGAGGGCGCCATGG  
AACGCAGAAAGATCAACGAGGAATTCGGGACATCAACCTCACAGATCTGCGTGTCTATCGCAACCCCTTGGAGTGGAGGTTTCGGTTCGGTAGAGCT  
GGTCCAAACCAATGGAGATAGCTCCAGGTCTTTGGCCCTCAAGCAGATGAAAAAGTACAGATCGTGGAGACGCGTCAAGCAGCAACACATCATGTCC  
GAGAAGGAGATCATGGGCGAGGCAATGGCCAGTTTCATCGTGAAGCTTTCAAGACCTTCAAGGACAAGAAGTACCTGTACATGCTAATGGAGAGTT  
GCCTGGGTGGAGAGCTCTGGACGATTCTACGGGACAAGGGCAACTTCGACGACAGCACCACCCGCTTCTACAGCGCATGTGTGGTGGAGGCTTTGA  
TTACTTGCCTCGCGTAAACATCATCTACCGGATCTTAAAGCCGGAGAACCTGTGCTCAATGAACGGGGATATGTGAAGCTGGTGGACTTTGGCTTT  
GCCAAGAGCTGCAGACGGGCGAGGAGACCTGGACTTTCTGCGGCATCCAGAGTACGTGGCTCCCGAGGTGATTTCAACCGGGGCGACGACATCA  
GTCCGATTAAGTGTGCTGGAGTGTCTATGTTTCGAGCTGCTTACTGGTACTGGTACCCTCCATTCACGGGCTCGGATCCCATGCCACATCAACATTT  
ACTTAAAGGCTGCAGCGCATCGAATTTCCCAAGGAATATACCCGCAATGCCAGCAACCTGATCAAGAAGCTCTGTCCGATTAATCCAGCCGAGCGT  
TTGGGCTACCAGCGTGGGGGAATCAGCGAGATCCAAAAGCACAATGGTTCGATGGCTTCTATTTGGTGGGGCTGCAGAACTGCACCTGGAACCGC  
CCATTAAGCCCGCGTGAAGCGGTAGTGGATACAACAACCTTTGATGACTATCTCCCGATCCTGAGGGTCCGCGCCAGATGATGTCACCTGGATG  
GGACAAGGACTTCTGAGGAGATCAGAACCCGTTTCTAGACGATGCTCTTAAACGCTTCTGCTGCAGAAAACAGGAGGATATGAAGCCAGGGA  
GGAAAAATGATCTTAAAGTCAGCAATGTACGCCAAGCCAAACAGCAACAGTCAAGCAGCTCGCATCGAAAAGCTGCCACAAAAAAAACAAGAAA  
CGTAGCAGTCCGAAGGTCAAGGGCCGACACAAAAGCACAATCATCCATCGTGTAGCTCCATTTGAGATTTATAGATACGCTCTCCGTGATGTTATAA  
CCATGATGTGCAACGCAATGAATTTATTAACGAGTTTATAACTATTATTTTATAATGAGGATATATGTGTCTAGTTCCGCTTGGAAATGATGTAAT  
GTAAGTAGGCTGTGACTCTGTTTCAGAGCTGTGTAGCCATGTGCATGTATAAATTCAGCTATTTGTATCTATTAATAATTTTAAACATAATTT  
TACACATCAATTTGTAAGCATACAAAATCGGGTTCCTTATAGCTGTAAAGAACATTTGAAAGCAACATTTGACCAAGATCTTCGCTACGACATTT  
CTTAAATTTCTATGTGGCTCTCTACTGTCTTTTCAATTAGTCTTAGCGATCATGTCTATTATATGTACGAATAACATGCCCTTTTAAATGTCTTTTT  
AAGTAAATCAGCTAGAAATGAATAAACAAATGTATCCGAT

>RC

ATTCGTCCGGCAGGCGGGCTAGCGAGAAAACGTGTGTGGCGCATGCGCATGCGCTCGGTTGCGAAAAGTGCACCTGGATTTGAAATTAAGCCACAAG  
AATAACAGAAATCAAACTCCCCACTTCGTGTTTGGCCATTTCTTCGGCTGTCGATCGTGATTTTCAATTCGCCCTCGTGTGTGCTTAAACGGCT  
GAAAACCGTAGGCATCGCCATTTCCAGTGACTCTTCAAAATTTCCGTGCGGAAAACGCGAGCTCTTTGGTTATGCAAAAAGACCTCCGAAAATAAC  
AAACAACAGGCACAAAAACATAAACTAAACGCTGGTGGAGCCAAAGACAAACGAATCAGTGCCTGCAGCTGGTCAAGTGAATTTTTCTTTTCGTAA  
TGAAAATCAACATTTATCCGGGCAAAGCCGTCGATGCGAGTCTCTCGTGGAGGGCAGCAGTCCATGGGTGCCCTGTACGAGGCCAATTTGGCTGAG  
GGCTGCGAATCAGCCCGCGCTCCAGCCACAACGGGCAACAAATTTAGCAGGAGCAGAGCAGCTCCGCGGCGAGCAGTTTCTCATCGAGGGCATCTCC  
GCCCTGAGCAAGTACCAATGACCTGGAGAATATCCGGCAGCTGGAGCTGCAGTCCGCTGCAGAAAACGCATAGCGAGCAGATTAAGGAACTCAGCG  
GCTACAGACCATCGGCATCGCAGCATCATCAGCAGCAGCAGATGCATAACGTTTGGGTGGCCGAGGATCAGGATCAGGAACACGAAGAACTGGAAGA  
TGCTTCGGAGGGAAAGGAGAAGTTGGCTAGTATCCAGGAACCCCTGCAGTTAAACCACTATGCTTGGATCCGACGGAGAGACCAAGGGTTCCCGA  
CCCCGGCAACAGTTCTCCGTGAAAACCGCTTCCGTGCTGCTCCCAACCTATGAGCAACCGCCAGTTATGCCACCTTGAGATGCGCCGCGGAAAA  
TCAAGGAAAATCTTAGCAAAAGTTTCTCCGCTACTCCACATTTCTCTCGGCTGCAGAGGATTTCCAGGATCAAGTAGTGTCTGCCAACAGCCACA  
GAGACTGATGGCTCCGCCACCCAGAGAACCCTCCGGAGCCCAAAAGGTTATCGAAACCCCTGAGCAGATCGCAAACTTCGGTTTCAGCGGTAC  
GCCACGGTTAGGATGCCAACAGACCACTTCGTTACAGCAAGTGTGGCCAGGTTAGGGATTTCCACGCCCTCCAGAGACGTTCTAGTTTGGAGC  
AGGCTACGAGGACTCAAAATGGAGGGGAGAAGGCTGTTCTGTCAGAAAGTCCCAAAATTTCAACAGCTGCCAGCAGTCCAGGATGCGCCGAGGAT  
TCTCAACGGGAGGGTTTCTGTATCCACGACCCCGCTCATCGTTCCAGTGCACACATATGCCCGTGCAGCAGGAGCGGAAAATCTCAAGGAGCAA  
TCCAGCGTGGACAGGAGGAGGAAGCAGAGAAGGATGGACCGTGGAGGTTTCCCGCAGGGCAAGTACCTTCCACATTTGTCGGGAGCGAAGGTCC  
TTGGCGAATTTGGCGATCTGTACAACCTGCCAGCGGACGGGACCATCACCGGATCACCGGATGCAACCTGTGGGCCATCGAGCGCCAGTGTCTTCA  
GACCATCATGATCGAAGGCGCTGATCCGGCAGGCGGAATCAGCAGATTTCTCAAGAGTGTGCCATTTAAAGACTGGCGGAGGAGCAGCTC  
ATCAAAAATCTCCGATGCTTGGAGGAGACGCACTACCAGCTGGCGACTACATAGTGCAGCGAGGGCGCCGAGGCGATACCTTCTTATCATCTCCA  
AGGAAAAGTGCAGTGCAGATCAAGCAGCAGGACACCGAGGAGGAGAAGTTCAATTCGCATGCTGGGCAAAGGGGATTTCTTTGGAGAGAAGGCTCT  
CCAGGGCGATGATTCGCGCACGGCGAATATTTTGGAGTCCGCGATGGGCTCAGTTGTCTGGTCACTGCAGCAGACCTTCAATCAGCTAAT  
TCCAATCTGGACGAGATCAAGCATCGTACGACGAGGCGCCATGGAACGCAGAAAAGATCAACGAGGAATTCGGGACATCAACCTCACAGATC  
TGCGTGTCAATCGCAACCTTGGAGTTGGAGTTTGGTTCGCGTGAAGTGGTCCAAACCAATGGAGATAGCTCCAGGTCCTTTGCCCTCAAGCAGAT  
GAAAAGTACAGATCGTGGAGACGCGTCAAGCAGCAACACATCATGTCGAGAAAGGAGATCATGGGCGAGGCCAATTTGCCAGTTCATCGTGAAGCTG  
TTCAAGACCTTCAAGGACAAGAAGTACCTGTACATGCTAATGGAGAGTTGCCTGGGTGGAGAGCTCTGGACGATTTCAAGGACAAGGGCACTTCG  
ACGACAGCACCCCGCTTCTACAGGATGTGTGGTGGAGGCTTTGATTAATGACTGCACTCGCGTAACATCATCTACCGCATCTTAAAGCCGAGAA  
CCTGTGCTCAATGAACGGGATATGTGAAGCTGGTGGACTTTGGCTTTGCCAAGAAGCTGCAGACGGGCGAGGAAGACTGGACTTTCTGCGGCAT  
CCAGAGTACGTGGCTCCCGAGGTGATTTCAACCGGGGCCAGACATCAGTGGGATTTACTGGTCCGTGGGAGTGTCTATGTTTCGAGCTGCTTACTG  
GTACCCCTCCATTCAGGGCTCGGATCCCATGCGCACCTACAACATTTAATTAAGGCAATCGACGCCATCGAATTTCCAAGGAATATCACCCGCAA  
TGCCAGCAACCTGATCAAGAAGCTGTGTCGCGATAATCCAGCCGAGCGTTGGGCTACCAGCTGGGGGAATCAGCGAGATCCAAAAGCACAATGG  
TTTCGATGGCTTCTATTGGTGGGCGCTGCAGAACTGCACCTTGAACCCGCTTAAAGCCCGCTGAAAAGCGTAGTGGATACAACAACAACTTTGATG  
ACTATCTCCCGATCTGAGGGTCCGCCGAGATGATGTCACCTGGATGGGACAAGGACTTCTGAGGAGAATCAGAACCCGTTTCTTAGACGATGCT  
CTCTAAACGCTTCTGCTCGAAAAACAGGAGGATATGAAAGCCAGGAGGAAAAATGATCTTAAAGTGCAGCATATGACGCCAAAGCCAAACAGCA  
ACAGTCAAGCAGCTCGCATCGAAAAGCTGCCACAAAAAAAACAAAGAAAGCTAGCAGTGCAGAAAGTCAAGGGCCGACAAAAAGCACAATCATCCAT  
CGTGTAGCTCCATTTAGATTTATAGATACGCTCCGCTGATGTTATAACCATGATGTGCAACGCAATGAAATTTAATACAGTATTTAATCACTATAT  
TTTATAATGAGGATATATGTGTCTAGTTTCGCTTGGAAATGATGTAATTTGTAAGTAGGCTGTGACTCTGTTTCAGAGCTCTGTTAGCCATGTGCAT  
TGATAAAATTCAGCTATTTGATCTATTAATAATTTTAAACATAATTTATACACATCATTTGTTAAAGCATACAAAATCGGGTTCCTTATAGTCTGTA  
AGAGAACATTTGAAAGCAACATTTGACCAAGATCTCCGTCACACATTTCTTAAATTTCTATGTGGCTCTCTACTGTCTTTCAATTAGTCTTAGCGA  
TCATGTCTATTATATGTACGAATAACATGCCCTTTTAAATGTCTTTTTTAAAGTAAATCAGCTAGAAAATGAATAAACAAATTTGATCCGAT

>RD

ATTCGTCCGGCAGGCGGGCTAGCGAGAAAACGTGTGTGGCGCATGCGCATGCGCTCGGTTGCGAAAAGTGCACCTGGATTTGAAATTAAGCCACAAG  
AATAACAGAAATCAAACTCCCCACTTCGTGTTTGGCCATTTCTTCGGCTGTCGATCGTGATTTTCAATTCGCCCTCGTGTGTGCTTAAACGGTAT  
TATAGAGCATTTTGCATATGGCAACCGCTGCCAGTGAATTAATAATAAAGCCACAACAGGACAATTACCATGCCTTGGCGATATGCCCTTTGAGCT  
ATTTCCAACAATAATGCTTACATAAATAGCAGCTCTGGTTGATGTTCTAAATAGCAAGTAAACAAAACCGCACAATTTCCCATGCTCGGTTTTTCC

GCTCGGCTGTAATTATGTTGAAAGAGATCGGGAACGCTTCGTGTTAATTTCTTTGAACTGCTCGCAAATTTCTTGAATAAAGTGAATAAAAAGTGA  
AAGTGAATTTCTTAAGCACTCGCATTAAAGTGAGGGAATAAGCTTAAAAACCCACCGGACTTAAAGAGAATGAGACGCAGAAACGGAGACTTGGAT  
TTTGTCTTTTTCTCGAATTGAAGCAAGATCACTTGAAGAAATTCGGCCCTGAAACCCGTAGGCATCGCCATTTCCAGTGAATCTTCAAATATTC  
GTGCGGAAACTCGAGAGCTCTTTGGTTATGCAAAAAGACCTCCGAAAATAACAAACACAGGCACAAAAACATAAACTAAACGCTGGTGGAGCCAAA  
GACAAACGAATCAGCTCGCTGCAGCTGGTCAAGTGAATTTTTCTTTCTGTAATGAAAATCAAACATTTATCCGGGCAAAGCCGTGATGCGAGTCTCT  
CGCTGGAGGGCAGCAGTGCATGGTGGCTGTACGAGGCCAATGGCTGAGGGCTGCGAATCAGCCCGCCGTCCAGCCACAACGGGCACCAAAAT  
GAGCAGGCAGAGCAGCTCCGCGGCAGCAGATTTCCCTCATCGAGGGCATCTCCGCCCTGAGCAAGTACCAAATGACCCTGGGAATATCCGGCAGCTG  
GAGCTGCAGTCCGGTGACAAACGCATAGCGAGCACGATTAAGGAACTCAGCGGCTACAGACCATCGGCACTGCAGCATCATCAGCAGCAGCAGATGC  
ATAACGTTTGGGTGGCCGAGGATCAGGATCAGGAACACGAAGAAGTGAAGATGCTTCGGAGGGAAAGGAGAAGTTGGCTAGTATCCAGGAACCCCC  
TGCAAGTTAACCATATGTCCTGGATCCGACGGAGAGACCAAGGTTCCAGACCCCGCAACAGTTTCCCGTGAACCCGCTTCTTTCGCTCGCTCC  
CAAACCATGTCGCAACCCGCTTATGCCACTTGAGATCGCCGCGGAAAATCAAGGAAAATCTTAGCAAAAGTTCTCCGCTACTCCACATTTCT  
CCTCGGCTGCAGAGATTTCCAGGATCAAGTAGTGTATGCCAACAGCCACAGAGACTGATGGCTCCGCCACCCAGAGAACCCTCCGGACCCACC  
CAAAGGGTATCGAAACCCCTGAGCAGATCGCAAACTTCGGTTTCAGCGGTACGCCACGGTTAGGATGCCAACCCAGACCACTTCGTTACGAGAAGT  
GTGGCCAGGTCTAGGGATTTCAAACGCCCTCCAGAGACGCTCTCAGTTTGGAGCAGGCCATCGAGGGACTCAAATTTGGAGGGGAGAAGGCTGTTCTGTC  
AGAAGAGTCCACAATTTACCAGCTGCCAGCAGTAATGGCAGCTCCAAGGATCTCAACGGGGAGGGTTTCTGTATCCACGACCCCGCTCATCGT  
TCCAGTGCACACATATGCCCGTGCAGCAGGACGGGAAATCTCAAGGAGCAATCCAGCGGTGGACAGGAGGAGAAGCAAGGATGGACGGCTG  
GAGGTTTCCCGCAGGGCAAGTACCTCTCCACATTGTCTGGAGCGAAGGCTCTTGGCGAATTGGCGATCCTGTACAACGCCAGCGGACGGCGACCA  
TCACCGGATCACCAGTGCACCTGTGGGCCATCGAGCGCAGTGTCTCCAGACCATCATGATGCGAACGGGCTGATCCGGCAGGGGAAATACAG  
CGATTTCTCAAGAGTGTCCCATCTTTAAAGACCTGGCGGAAGACACGCTCATAAAAATCTCCGATGTCTTGGAGGAGACGCACTACCAGCGTGGC  
GACTACATAGTGAGGATGGCCGCGCATCAAGTATCTTCCAACTCATCTCCAAGGAAAAGTGGCAGTGCAGCATCAAGCAGCAGGACCGCAGGAGG  
AGAAGTTCAATTCGCATGCTGGGCAAAGGGGATTTCTTTGGAGAGAAGGCTCTCCAGGGCGATGATCTGCGCACGGCGAATATTTATTTGCGAGTCCGC  
CGATGGCGTCAGTTGTCTGGTTCATCGATCGCGAGACCTTCAATCAGCTAATTTCCAACTCTGGACGAGATCAAGCATCGCTACGACGACGAGGCGCCG  
ATGGAACGCAGAAAAGATCAACAGGAAATTCGGGACATCAACCTCACAGATCTGCGTGTATCGCAACCCCTGGAGTTGGAGGTTCCGGTCCGGTAG  
AGCTGGTCCAAACCAATGAGTCCAGGTCCTTTGCCCTCAAGCAGATCAAGAAAGTCAAGATCGTGGAGACGGTTCACAACGAGCAACACATCAT  
GTCCGAGAAGGAGATCATGGGCGAGGCCAATGGCAGTTCATCGTGAAGCTGTTCAAGACCTTCAAGGACAAGAAGTACCTGTACATGCTAATGGAG  
AGTTGCCCTGGGTGGAGAGCTCTGGACGATTTACGGGACAAGGGCACTTCGACGACAGCACCACCCGCTTCTACACGGCATGTGTGGTGGAGGCT  
TTGATTAATGCACTCGCGTAACATCATCTACCGCATCTTAAAGCCGAGAACCTGCTGTCTCAATGAACGGGATATGTGAAGCTGGTGGACTTTGG  
CTTTGCCAAGAACTGCAACGCGAAGGACCTGGACTTTCTGCGGCATCAAGGAAAGTCAAGATACGTTGCTTCCAGGCTCCCGAGGTTCTCAACCGGGCCAGC  
ATCAGTGGGATTAATGGTGGTGGAGTGTCTATGTTTCGAGTGTCTACTGGTACCCCTCCATTCACGGGCTCGGATCCCATGGCCACCTACAACA  
TTATACTTAAGGCATCGACGCCATCGAATTTCCCAAGGAATATCACCCGCAATGCCAGCAACCTGATCAAGAGCTCTGTCCGGATAATCCAGCCGA  
CGGTTTGGGCTACCAGCGTGGGGAAATCAGCGAGATCCAAAAGCACAATGGTTTCATGGCTTCTATTTGGTGGGGCTGCAGAACTGCACCCTGGAA  
CCGCCCATTAAGCCCGCTGAAAAGCGTAGTGGATACAACAACTTTGATGACTATCTTCCGATATCTTCCGATGAGGTTCCCGCAGATGATGATGCT  
GATGGGACAAGGACTTCTGAGGAGAATCAGAACCCTTTCTAGACGATGCTCTTAAACGCTTCTGCTGCAGAAAACCCAGGAGGATATGAAAGCCA  
GGAGGAAAAATGATCTTAAGTGCAGCATATGATCGCCAAAGCCAAACAGCAACAGTCAAGCAGCTCGCATCGAAAAGCTGCCACAAAAAAAACAAA  
GAAACGTAGCAGTCCGAAAGTCAAGGGCCGACAAAAAGCACAATCATCCATCGTCTAGCTCCATTTGAGATTTATAGATACGCTCCCGTGTGTT  
ATAACCATGATGTCAACGCAATGAATTTATTAACGAGTTTATAACTATTTATTTATAATGAGGATATATGTGTCTAGTTCCGTTGGAAATGATGTA  
AATTTGTAAGTAGGCTGTGACTCTGTTTCAGAGCTCTGTTAGCCATGTGCATTGTATAAAATCAGCTATTTGTATCTATTAATATTTTAAACATAA  
TTATACACATCATGTTAAAGCATACAATCGGGTTCGCTTATAGTCTGTAAGAGAACATTTGAAAGCAACATTTGACCAAGATCTTCCGTACAC  
ATTTCTTAAATTTCTATGTGGCTCTCTACTGTCTTTCATTAGTCTTAGCGATCATGTCTATATATGATACGAATAACATGCCCTTTAATTTGCTT  
TTTTAAGTAAATCAGCTAGAAATGAAATAACAAATTTGATCCGAT

>RE

ATTCGTCGGCAGGGCGGTAGCGAGAAAACGTTGTTGGCGCATGCGCATGCGCTCGGTTGCGAAAAGTGCACCTGGATTTGAAATTAAGCCACAAG  
AATAACAGAAATCAAACCTCCCCACTTCGTGTTTGGCCATTTCTTCGGCTGTCGTATCGTGATTTTCAATTCGCCCTCGTGTGCTTAACGGTAT  
TATAGACATTTTGCATATGGCAACCGTGCAGTGAATTAATAAAGGCCACAAACAGACAATTACCATGCTTTGCGCATATGCTTTGAGCT  
ATTTCCAAACAATAATTTACATAAATAGCAGCTCTGGTTGATGTTCTAAATAGCAAGTAAACAAAACCCGACAATTTCCCATGCTCGGTTTTC  
CTCGGCTGTAATTTATGTTGAAAGAGATCGGGAACGCTTCGTGTTAATTTCTTTGAACTGCTCGAAAATTTTGGAAATAAGTGAATTAAGAGTGA  
AAGTGAATTTCTTAAGCACTCGCATTAAAGTGAGGGAATAAGCTTAAAAACCCACGGACTTAAAGAGAATGAGACGCAGAAACGGAGACTTGGAT  
TTTGTCTTTTTCTCGAATTGAACGCAAGATCACTTGAAGAATTCGGGCTGAAAACCGTAGGCATCGCCATTTCCAGTGTACTTCAAATATTTCC  
GTGCGGAAACTGCAGAGCTCTTTGTTATGCAAAAAGACCTCCGAAAATAACAAACACAGGCACAAAAACATAAACTAAACGCTGGTGGAGCCAAA  
GACAAAACGAATCGAAGCTGCAGTGTCAAGTGAATTTTCTTTCTGTAATGAAAATCAAACATTTATCCGGGCAAAGCCGTCATGCGAGTCTCT  
CGCTGGAGGGCAGCAGTGCATGGTGGCTGTACGAGGCCAATGGCTGAGGGCTGCGAATCAGCCCGCCGTCCAGCCACAACGGGCACCAAAAT  
GAGCAGGCAGAGCAGCTCCGCGGCAGCAGTTCCTCATCGAGGGCATCTCCGCCCTGAGCAAGTACCAAATGACCTGGAGATAATCCGGCAGCTG  
GAGCTGCAGTCCGCTGACAAACGCATAGCGAGCAGGATTAAGGAACTCAGCGGCTACAGACCATCGGCACTGCAGCATCATCAGCAGCAGCAGATGC  
ATAACGTTTGGGTGGCCGAGGATCAGGATCAGGAACACGAAGAAGTGAAGATGCTTTCGGAGGGAAAAGGAGAAGTTGGCTAGTATCCAGGAACCCCC  
TGCAAGTTAACCATATGTCCTGGATCCGACGGAGAGACCAAGGTTCCAGACCCCGCAACAGTTTCCCGTGAACCCGCTTCTTTCGCTCGCTCC  
CAAACCATGTCGCAACCCGCCAGTTATGCCACTTGAGATCGCCGCGGAAAATCAAGGAAAATCTTAGCAAAAGTTCTCCGCTACTCCACATTTCT  
CCTCGGCTGCAGAGGATTTCCAGGATCAAGTAGTGTATGCTGCCAACGCCACAGAGACTGATGGCTCCGCCACCCAGAGAACCCTCCGGAGCCACT  
CAAAGGATATCGAAACCCCTGAGCAGATCGCAAACTTCGGTTACGGCTACGCCACGGTTAGGATGCCCAACCGGCACTTCGTTGACGAGAAGT  
GTGGCCAGGTCTAGGGATTTCAAACGCCCTCCAGAGACGCTCTCAGTTTGGAGCAGGCCATCGAGGGACTCAAATTTGGAGGGGAGAAGGCTGTTCTGTC  
AGAAGAGTCCACAATTTACCAGCTGCCAGCAGTAATGGCAGCTCCAAGGATCTCAACGGGGAGGGTTTCTGTATCCACGACCCCGCTCATCGT  
TCCAGTGCACACATATGCCCGTGCAGCAGGACGGGAAATCTCAAGGAGCAATCCAGCGGTGGACAGGAGGAGAAGCAAGGATTAAGGGTGG  
AAGGATTTCTATGTTTTAAGTGGCAGGATAGGCTATAGTACTATTAAGTCAAGTCAAGTCAAGTCAAGTCAAGTCAAGTCAAGTCAAGTCAAGTCAAGT  
AATTTTCTCCAGATGGACCGGTGGAGGTTTCCCGCAGGGCAAGTACCTCTCCACATTGTCTGGAGCGAAGGCTCTTGGCGAATTGGCGATCCTGTA  
CAACTGCCAGCGGACGGCGACCATCACCGCATCACCGAGTGCACCTGTGGGCCATCGAGCGCCAGTGTCTCCAGACCATCATGATGCGAACGGGC  
CTGATCCGGCAGGGGAAATACAGCGATTTCTCAAGAGTGTGCCCATCTTAAAGACCTGGCGGAAGACACGCTCATCAAATCTCCGATGCTTTGG  
AGGAGACGCACTACCAGCGTGGGACTACATAGTGGCGCCGAGGCGATACCTTCTTCATCATCTCAAGGAAAAGTGGAGGATGATGATGATGATGATGATGAT  
CAAGCAGCAGGACACGCAGGAGGAGAAGTTCATTCGCATGCTGGGCAAAGGGGATTTCTTTGGAGAGAAGGCTCTCCAGGGCGATGATCTGCGCACG  
GCCAATATTTATTTGCGAGTCCGCGCATGGCGTCAAGTGTCTGTCATCGATCGCAGACCTTCAATCAGCTAATTTCCAACTTGGACGAGATCAAGC  
ATCGCTACGACGACGAGGGGCCATGGAACGCAGAAAGATCAACGAGGAATTCGGGACATCAACCTCACAGATCTGCGTGTATCGCAACCCCTGG

AGTTGGAGGTTTCGGTTCGCTAGAGCTGGTCCAACCAATGGAGATAGCTCCAGGTCCTTTGCCCTCAAGCAGATGAAAAAGTCACAGATCGTGGAG  
ACGCGTCAGCAGCAACACATCATGTCCGAGAAGGAGATCATGGGCGAGGCCAATTGCCAGTTCATCGTGAAGCTGTTCAAGACCTTCAAGGACAAGA  
AGTACCTGTACATGCTAATGGAGAGTTGCCTGGTGGAGAGCTCTGGACGATTTCCACGGGACAAGGGCAACTTCGACGACAGCACCACCCGCTTCTA  
CAGCGCATGTGTGGTGGAGGCCCTTTGATTACTTGCACCTCGCGTAACATCATCTACCGCGATCTTAAGCCGGAGAACCCTGCTGCTCAATGAACGGGGA  
TATGTGAAGCTGGTGGACTTTGGCTTTGCCAAGAAGCTGCAGACGGGCGAGGAAGACCTGGACTTTCTGCGGCACTCCAGAGTACGTGGCTCCCGAGG  
TGATTTCAACCGGGGCCACGACATCAGTGGGATTACTGGTTCGCTGGGAGTGTCTCATGTTCCGAGCTGCTTACTGGTACCCTCCATTACCGGGCTC  
GGATCCCATGGCGACCTACAACATTATACTTAAGGGCATCGACGCCATCGAATTTCCAAAGGAATATCACCCGCAATGCCAGCAACCTGATCAAGAAG  
CTCTGTGCGGATAATCCAGCCGAGCGTTTGGGCTACCAGCGTGGGGGAATCAGCGAGATCCAAAAGCACAAATGGTTTCGATGGCTTCTATTGGTGGG  
GCCTGCAGAACTGCACCTTGGAAACCGCCATTAAAGCCGCGTGAAGAGCTAGTGGATACAACAACCTTTGATGACTATCTCCCGATCCTGAGGG  
TCCGCGCCGAGATGATGTCACCTGGATGGGACAGGACTTCTGAGGAGAATCAGAACCCGTTTCTTAGACGATGCTCTTAACCGCTTCTGCTCGAA  
AAACCAGGAGGATATGAAAGCCAGGGAGGAAAAATGATCTTAAGTGGCCATATGTACGCCAAAGCCACAGCAACAGTCCAGCAGCTGCATCGAA  
AAGCTGCCACAAAAAAACAAAGAAACGTAGCAGTCGCAAGGTCAAGGGCCGACACAAAAGCAAAATCATCCATCGTCGTAGCTCCATTTGAGATT  
TATAGATACGCTCCGCTGATGTTATAACCATGATGTGCAACGCAATGAATTTATTAACGAGTTTATAACTATTATTTTATAATGAGGATATATGTGT  
CTAGTTCCGCTTGAATGATGTAATTTGTAAGTAGGCTGTGACTCTGTTTCCAGAGCTCTGTAGCCATGTGCATTGTATAAATTCAGCTATTTGTA  
CTATTAATAATTTTTAACATAATTTATACACATCATTGTTAAAGCATACAATCCGGTTCGCTTATAGTCTGTAAGAGAACATTTGAAAGCAACAT  
TTGACCAAGATCTTCCGTCACACATTTCTTAAAATTTCTATGGCCCTCTACTGCTTCTTCAATTTAGCTTAGCGATCATGCTATTATATGTACGAA  
TAACATGCCCTTTAATTGCTTTTTTAAAGTAAATCAGCTAGAAATGAATAAACAAATTTGATCCGAT

>RF

ATTCGTCGGCAGGCGGCTAGCGAGAAAACGTGTGTGGCGCATGCGCATGCGCTCGGTTGCGAAAAGTGCACCTGGATTGAAATTAAGCCACAAG  
AATAACAGAAATCAAACCTCCCCACTTCGTGTTTGGCCATTTCTTCGGCTGTCGATCGTGATTTTCAATTCGCCCTCGTGTGTGCTTAACGGCAGC  
TCFGGTTGATGTTCTAAATAGCAAGTAACAACAAACCCGACAAATTTTCCCATGCTCGGTTTTTCCGCTCGGCTGTAATTTATGTTGAAAGAGATCGGGA  
AACGCTTCGTGTTAATTTCTTTGAACCTGCTCGCAAATTTCTTGAATAAAGTGAATTTAAAAGTGAAGTGAATTTTAAAGCACTCGCATTAAGTGAG  
GGAAATAAGCTTAAAAACACCCACGGACTTAAAGAGAAATGAGACGCAGAAACGGAGACTTGGATTTTCTCTTTTTCGAAATGAAACGCAAGATCA  
ACTTGAAGAATTCGGGCTGAAAACCGTAGGCATCGCCATTTCCAGTGACTTCAAAATTTCCGTCGCGGAAACTGCAGAGCTCTTTGGTTGATGCA  
AAAGACTCCGAAAATAACAACAGGCAACAAAGCAAAAACATAAAACTAAACCTGGAGCCAAAGACAAACGAATCAGCTCGCTGCTGATGTTCAAG  
TGAAATTTTCTTTCGTAATGAAATCAAACATTTATCCGGGCAAGCCGTCGATGCGAGTCTCTCGCTGGAGGGCAGCAGTGCATGGGTGCCCTGT  
ACGAGGCCAATTTGGCTGAGGGCTGCGAATCAGCCCGCGCTCCAGCCACAACGGGACCAAAATTTGAGCAGGCAGAGCAGCTCCGCGCCGAGCAGTTT  
CCTCATCGAGGGCATCTCCGCCCTGAGCAAGTACCAATGACCTGGAGAATATCCGGCAGCTGGAGCTGCAGTCCGCTGACAAAACGCATAGCGAGC  
ACGATTAAGGAATCAGCGGCTACAGAGCATCGGCACTGCAGATCAGCAGCAGCAGAGATGCATAACGTTTGGGTGGCCGAGGATCAGGATCGGA  
AACACGAAGAATGGAAGATGCTTCGGAGGAAAGGAGAAGTTGGCTAGTATCCAGGAACCCCTGCAGTTAACCACTATGCTCCTGGATCCGACGGA  
GAGACCAAGGTTTCCAGACCCCGGCAACAGTTCTCCGTGAAACCGCCTTCTTTCGCTCGCTCCCAAACCATGTCGCAACCGCCAGTTATGCCACC  
TTGAGATCGCCGCGGAAATCAAGGAAATCTTAGCAAAATTTCTCCGCTACTCCACATTTCTCTCGGCTGCAGGAGTATCCAGGATCAAGTAG  
TGATCTGCCAACAGCAGAGACTGATGGCTCCGCCAACAGAGAACCCGCTTCGGAGCCACCCAAAGGGTATCGAAACCCCTGAGCAGATCGCA  
AACTTCGGTTACAGCGTACGCCAGGTTAGGATGCCAACACAGCACTTCGTTTACAGAGAAGTGTGGCCAGGCTAGGGATTCCAACGCCTCCAG  
AGACGCTCAGTTTGGAGCAGGCCATCGAGGGACTCAAATTTGAGGGGGAGAAGGCTGTTCGTCAGAAAGAGTCCACAAATTTACCAGCTGCCAGCA  
GTAATGGCAGCTCAAGGATCTCAACGGGGAGGGTTTCTGTATCCACGACCCCGCTCATCGTTCCAGTGCACACATATGCCCGTCGACGCGGCA  
GGAAATCTCAAGGATCCTCAAGCGGTTGGACAGGAGGAAAGATCAGCAGCAGCAGAGTGGAGGTTTCCCGCGGAGGATCAGGATCAGGATCCACA  
TTGTCGGGAGCGAAGGTCCTTGGCGAATTTGGCGATCCTGTACAACCTGCCAGCGGACGGCGACCATCACCGCGATCACCGAGTGAACCTGTGGGCCA  
TCGAGCGCAGTGTCTCCAGACCATCATGATGGAAACGGGCTGATCCGGCAGGCGGAATACAGCGATTTCTCAAGAGTGTGCCATCTTTAAAGA  
CCTGGCGGAAGACAGCTCATAAAAATCTCCGATGTCTTGGAGGAGACGCATACCAGCGTGGCGACTACATAGTGCGCCAGGGCGCCGAGGCGAT  
ACCTTTCATCATCTCAAGGAAAGTGCAGTGCAGTCAAGCAGGACAGCAGGAGGAGAAGTTCAATTCGATGCTGGGCAAGGGGAT  
TCTTTGGAGAGAAGGCTCTCCAGGGCGATGATCTGCGCACGGCAATATTTTTCGAGTCCGCCGATGGCGTCAGTTGTCTGGTCAATCGATCGCGA  
GACCTTCAATCAGCTAATTTCCAATCTGGACGAGATCAAGCATCGCTACGACGACAGGGCGCCATGGAACGCAAGAAAGTCAACGAGGAATTCGG  
GACATCAACCTCAGATCTGCGTGTCAATCGCAACCCCTTGGAGTTGGAGTTTTCGCTCGCGTAGAGCTGGTCCAAACCAATGAGATAGCTCCAGGT  
CCTTTGCCCTCAAGCAGATGAAAAGTCAAGATCGTGGAGACCGCTCAGCAGCAACATCATGTCGAGAGGAGATCATGGGCGAGGCCAATTTG  
CCAGTTTCAATCGTAAGCTGTTTAAAGCCTTCAAGGACAAGAAGTACCTGTACATGCTAATGGAGAGTTGCCGTTGGTGGAGAGCTTGCAGCATCTA  
CGGACAAGGGCAACTTCGACGACAGCACCACCCGCTTCTACACGGCATGTGTGGTGGAGGCTTTGATTACTTGCACCTCGGTAACATCATCTACC  
GCGATCTTAAGCCGGAGAACCTGCTGCTCAATGAACGGGGATATGTGAAGCTGGTGGACTTTGGCTTTGCCAAGAAGCTGCAGACGGGCGAGGAAG  
CTGGACTTTCTGCGGCACTCCAGATACGTGGCTCCCGAGGTGATTTCAACCGGGCCACGACATCAGTCCGGATTACTGGTTCGCTGGGAGTGTCT  
ATGTTCCGAGCTGCTTCTAAACGCTTCTGCTGCAGAAAACAGGAGGATATGAAAGCCAGGGAGGAAAAATTTGATCTTAAGTGCAGCCATCGAATTC  
CAAGGAATATCACCCGCAATGCCAGCAACCTGATCAAGAAGCTCTGTGCGATAATCCAGCCGAGCGTTTGGGCTACCAGCGTGGGGGAATCAGCGA  
GATCCAAAAGCACAATGGTTCGATGGCTTCTATTGGTGGGGCTGCAGAACTGCACCCCTGGAACCGCCATTAAGCCCGCGGTGAAAAGCGTAGTG  
GATACAACAACCTTTGATGACTATCTCCCGATCCTGAGGGTCCGCGCCAGATGATGTCACCTGGATGGGACAAGGACTTCTGAGGAGAATCAGAAC  
CCGTTTCCCTAGACGATGCTCTCAACGCTTCTGCTGCAGAAAACAGGAGGATATGAAAGCCAGGGAGGAAAAATTTGATCTTAAGTGCAGCCATCATG  
TACGCCAAAGCCAACAGCAACAGTCAAGCAGCTCGCATGAAAAGCTGCCACAAAAAAACAAAGAAACGTAGCAGTCCGAAAGGTCAGGGCCGACA  
CAAAGACAAATCATCCATCGTCGTAGCTCCATTTGAGATTTATAGATACGCTCTCCGTGATGTTATAACCATGATGTCAACGCAATGAATTTATTA  
ACGAGTTTATAACTATTTTATAATGAGGATATATGTCTAGTTCCGTTTGAATTTGATGTAATTTGTAAGTAGGCTGTGACTCTGTTTCCAGAG  
CTCTGTTAGCCATGTGCATTTGATAAATTCAGCTAATTTGATCTATTAATATTTTTAACATAAATTTACACATCATTTGTAAGAGCATAAATTCG  
GGTTGCCTTATAGTCTGTAAGAGAACATTTGAAAGCAACATTTGACCAAGATCTTCCGTCACACATTTCTTAAAATTTCTATGTGGCTCTCTACTGT  
CTTTCATAGTCTTAGCGATCATGCTATTATATGTACGAATAACATGCCCTTTAATTGCTTTTTTAAAGTAAATCAGCTAGAAATGAATAAACAA  
AATTGATCCGAT

>RG

ATTCGTCGGCAGGCGGCTAGCGAGAAAACGTGTGTGGCGCATGCGCATGCGCTCGGTTGCGAAAAGTGCACCTGGATTGAAATTAAGCCACAAG  
AATAACAGAAATCAAACCTCCCCACTTCGTGTTTGGCCATTTCTTCGGCTGTCGATCGTGATTTTCAATTCGCCCTCGTGTGTGCTTAACGGTAT  
TATAGAGCAATTTGCATATGGCAACCGCTGCCAGTGAATTAATAAAGCCACAACCCAGACAATTACCATGCCTTGCAGCATATGCCCTTGGAGCT  
ATTTCCAACAATGCTTACATAAATAGCAGCTCTGGTTGATGTTCTAAATAGCAAGCACAACAAACATAAATCAAACCTAAACCGTGGTGGAGCCAAAGACA  
AACGAATCAGTCCGTCAGCTGGTCAAGTGAATTTTTCTTTTCGTAATGAAATCAAACATTTATCCGGGCAAGCCGTCGATGCGAGTCTCTCGCT



ACATCAGTGGGATTACTGGTGCCTGGGAGTGCTCATGTTTCGAGCTGCTTACTGGTACCCCTCCATTACGGGCTCGGATCCCATGGCGACCTACAA  
CATTATACTTAAGGGCATCGACGCCATCGAATTCCTCAAGGAATATCACCCGCAATGCCAGCAACCTGATCAAGAAGCTCTGTGCGGATAATCCAGCC  
GAGCGTTTGGGCTACCGCGTGGGGGAATCAGCGGAGATCCAAAAGCACAATGGTTCGATGGCTTCTATTGGTGGGGCTGCAGAATGCACCCCTGG  
AACCGCCCATTAAGCCCGCCGTGAAAAGCGTAGTGGATACAACTTTGATGACTATCCTCCCGATCCTGAGGGTCCGCCCGCAGATGATGTCAC  
TGATGGGACAAGGACTTCTGAGGAGAATCAGAACCCGTTTCCCTAGAGCATGCTCTTAAACGCTTCTGCTGCAGAAAACCAGGAGGATATGAAAGC  
CAGGGAGAAAAATGATCTTAAGTGGCCATATGTAGCCAAAGCCAAACAGCAACAGTCCAGAGCTCGCATCGAAAAGTCCACAAAAAACA  
AAGAAACGTAGCAGTCCGCAAGTCAAGGGCCGACAAAAAGCAATCATCCATCGTCTGATAGCTCCATTTGAGATTTATAGATACGCTCCCGTGATG  
TTATAACCATGATGTGCAACGCAATGAATTTTAAACGAGTTTATAACTATTTATTTTATAATGAGGATATATGTGTCTAGTTCCGTTGGAATGATG  
TAAATTGTAAGTAGGCTGTGACTCTGTTTCAGAGCTCTGTTAGCCATGTGCATTGTATAAATTCAGCTATTTGTATCTATTAATATTTTTAACAT  
AATTTATACACATCATTGTAAAGCATACAAATCGGGTTCCTTATAGTCTGTAAAGAAACATTTGAAAGCAACATTTGACCAAGATCTCCGTCAC  
ACATTTCTAAAATCTATGTGGCCTCTACTGTCTTTCATTAGCTTAGCCATCATGTCTATTATATGTACGAATAACATGCCCTTTAATTTGTC  
TTTTTTAAGTAAATCAGCTAGAAATGAATAAACAAATTTGATCCGAT

>RI

AGTCTGTTGGAATTTCTCGTGGTGTGCGGTTGTCGTTTGTGCGCATCGTGCTTGGAAATGACTTTAGCGGCATTTTTATAAGAATCAATGCAACGGC  
TGTTTCTTGCATTTTGGCACAAGTCTTAAATAAAAGAAAAAATAATATATATATGCGATTGGCGTTTATCACAATATCCACATCGCCAT  
TTAGTTCCGGCGTTTTCATCGACTTGTGCTTGTGTAACGCAACGCAAGTGGAAAGACTCGAGAAAACAAAAGTGCAGGCCGTCTAAATTTGATGGC  
GAAGTTTTCGTCGCCCTGCATTTTCAATTTATAAATAATTTTCGGCCTTAATTCGTGCTTCTGTGAATTAACAGGAAACTGAAGAGTGCAGC  
GCGAGACAGCCGATCACAATCAACAAGTGGAAACGAAGAACTTTCTTCGAAAAGCCGGCTGATCGCAACAACAAGAAGAAAAGAGAGCGATTCT  
CTGCGACTGGAACCATACATTTACATCGCCCTGGAATTTCTTCACTTTTCGTTCCACATGCGACCCCAACGCTGGCTGATTTGAGTTTTCGCTGGC  
GGCTGTTGATCAGGAAAGCCGCTGGATGCGTTTCTGCTTGTGCTTCGCAACCAAGCGGCCAGCCAAAATCCAACAGCAATGCACC  
ACACAGCAGCACCACTGTAGATGCACCCAGCCTCCAGCGGATGTAGTATGATGCCACTGTACCCAGTAGCAACAACAGCACCACCAACAGCCCA  
GTTAGTAATCTGTTCTATGCGGACTACCAGAAGCTGCAGCGGCGATAATCGATCGGGACTGGGAGCGGGACAGAGATACAGATACAGATACCAGGA  
GCGAGGCCAAGCCACCGGACATTTGTGGAGCAGATAGAACCCGTAGAGGAGCAGAGACAGATACACACACAGATACAGTTCGCCGCGCAGAGATACAGAT  
ACAGATACCCCGACGCCCTTCCCATCGATACAGATACAGATACAGCAGCGCTATCGCCGGCACAGCAGTGCAGAAAGTGCAGTCTGAACACG  
AGCGAAAACGATTCGAATATTACGAGGCGTTACGAAAAGCAGCCAGTATGCAGCAGGAGCCGAACGCAACTATCAGTTCCCAACCGACTTGGGTC  
TGGTGAGCATCGTCAACAATAATAAACAACACAAACCCCATCCGAGTGGATCCAATAGCGGCAGCAACAACAACAGCAATATCAACAATAATCTGGT  
GGTGCGCATTTGTGACCTTGCAGCGCGCTGGTGGTCTCATAGGTTCTGGAGCATACGGGCTCGGGCTGCGGACTGATACCAGCACCCTACCCACTCG  
GATGTGCTGACCCACAGCTGATCTATGGCACACCGCCCTCGGGCGCCAGCAATTAACAGGATCCCGAAGCTTCTGCACCAACAGGAGCTGC  
AGCTACAGCAGCCGATCAGCAATTGACAGAGCTTCAGGCGCAGCAGCGAGGCTGTACACACAGCCAAAGCAACTATCAGTTCCCAACCGACTTGGGTC  
TCCGGGATCGAGTCAACCGGTGGCCATACCCGGAGCCACTTGCATTCGCCCAGCAACTGCAGCGCCCAACACGCTGAACCTGCAGCAGCAGATG  
CAGAGTCTGCGGATCTCGGGATGCACGCCAGCGGTACGGGTGGCTCGGCCAGCCCTCGCCGGTGGGCTGGTGGATCCGAATTTTATAGTACGCA  
ACTATGTGGCGCCTCGCCGAGGAGTGTCTTATTAGATCATAGTTCAGGCAAGGAGCTCAAGATACAGGAAATGCAAAGGGCCCTCCAGTTCAA  
GGACAACGAAATAGCCGATAAGTGCACCTTGAAGTCCAGATTTCCAGATGTCTTTCCCTTACGCCGTGGCAGTGCAGCGCGGTTGTGCGGGCAGCGGC  
GGAGCGTCCGGATCTGGAGTGGCGGAAGTGGTGGCAGTGGTCCCGCCACCGCCACAGGTGCCACACGCAAGTCCGGTCCAGATTTCCAGAGGCAGA  
GGCATTGGGTATCTCCGCCAGCCACAGAGCGAGTCTCGCTGCTCAGCAGCAGTTCAGCTTCCCAAATACGACAAGGATGAGCGCTCCCGTGA  
ACTTATCAAGGCTGCCATATTGGATAATGATTTTCAATGAAGAATCTGGATCTGACGAGATCCCGGAGATCGTTGACTGCATGATCCGGTTAAGTAT  
CCAGCCAAAGATCTGAGCTATCAGCAATTGACAGAGTGTCCGAAGCATCGTATTATGTTCATGGAAGATGAGCAGCGTGGAGGTTTCCCGGCTGATACCAACCCAG  
TCTCCACATTTGTGCGGAGCGAAGGTCCTTGGCGAATTTGGCGATCTGTACAACTGCCAGCGGACGGCACCATCACCCGATCACCCAGTGCACCT  
GTGGCCATCGAGCGCAGTGTCTCCAGACCATCATGATGCGAACGGGCTGATCCGGCAGGGGGAATACAGCGATTTCTCAAGAGTGTGCCATC  
TTTAAAGACCTGGCGGAAGACACGCTCATCAAATCTCCGATGCTTTGGAGGAGACGCACTACCAGCGTGGCGACTACATATGCGCCAGGGCGCC  
GAGCGATACCTTTCTCATCTCCTCAAGGGAAGTGCAGTGCAGATCAAGCAGCAGGACACGCAAGGAGGAGGATTCATTCGCTGCTGGGCAA  
AGGGATTTCTTTGAGGAGAAGGCTCTCCAGGCGATGATCTGCGCACGGCAATATTTTTCGAGTCCCGCGATGGCGTCAAGTTGTCTGGTCAATC  
GATCGGAGACCTTCAATCAGCTAATTTCAATCTGGACGAGATCAAGCATCGCTACGACAGCAGGAGGGCCATGGAACGCAAGATCAACGAGG  
AATTCGGGACATCAACCTCACAGATCTGCGTGTATCGCAACCTTTGGAGTTGGAGTTTCCGGTCCGCTAGAGCTGGTCCAAACCAATGGAGATAG  
CTCCAGTCTTTGCCCTCAAGCAGATGAAAAAGTCAAGATCGTGGAGCGCTCAGCAGCAACACATCATCTCCGAGGAGGATGATGGGCGAG  
GCCAATTCGCTGATCTGATGCTTTCAAGACCTTCAAGCAATTCAGGCAAGGAACTGCTGATCATGTAATGGAGAGTTTCCGCTGGGATGAGCTTGG  
CGATTCTACGGGACAAGGCAACTTCGACGACAGCACCACCGCTTCTACACGGCATGTGTGGTGGAGGCTTTGATTACTTGCATCTCGCTAACAT  
CATCTACCGCATCTTAAGCCGAGAACTGCTGCTCAATGAACGGGATATGTGAAGCTGGTGGACTTTGGCTTTGCCAAGAAAGCTCGAGCAGGG  
AGGAAGACTGGACTTTCTGCGGCACTCCAGAGTACGTGGCTCCCGAGGTGATTTCAACCGGGCCACGACATCAGTGGCGATTTACTGCTCGTGG  
GAGTGTCTGATGTTGCTTACTGTTACTGTTACCCCTCCATTCAGCGGCTCGGATCCCATGCGCACCTACCAACATATACTAATGAGGGCATTCGACCCAT  
CGAATTTCCAAGGAATATCACCCGCAATGCCAGCAACCTGATCAAGAAGCTCTGTGCGGATAATCCAGCCGAGCGTTTGGGCTACCAGCGTGGGGGA  
ATCAGCGAGATCCAAAAGCACAATGGTTTCGATGGCTTCTATTGGTGGGGCTGCAGAACTGCACCTGGAACCGCCCATTAAGCCCGCCGTGAAAA  
CGTAGTGGATAACAACAACTTTGATGACTATCTCCCGATCTGAGGGTCCGCCCGCAGATGATGCTACTGGATGGGACAAGGACTTCTGAGGAGA  
ATCAGAACCCGTTTCTTAGACGATGCTCTCAAACGCTTCTGCTGCAGAAAACCCAGGAGGATATGAAAGCCAGGGAGGAAAAATGATCTTAAGTGC  
GCCATATGACGCCAAAGCCAAACAGCAACAGTCAAGCAGCTCGCATCGAAAAGTCCCAAAAAAACAAGAAACCTAGCAGTCCGCAAGGTCAG  
GGCCGACAAAAAGCACAATCATCCATCGTCTGAGCTCCATTTGAGATTTATAGATACGCTCTCCGTGATGTTATAACCATGATGTGCAACGCAATGA  
ATTTATTAACGAGTTTATAACTATTTTTATAATGAGGATATATGCTCTAGTTCGCTTGGAAATTTGATGTAATTTGTAAGTAGGCTGTGACTCTG  
TTTCAGAGCTCTGTAGCTGATGATTAATAATTCAGCTATTTGGTATGATTAATAATTTTTTAACATAATTTATACACATATTGTTAAAGCAT  
ACAAATCGGGTTGCCCTTATAGTCTGTAAGAGAACATTTGAAAGCAACATTTGACCAAGATCTTCCGTCACACATTTCTAAAATTTCTATGTGGCCTC  
TCTACTGCTTTTCATTAGTCTTAGCGATCATGTCTATTATATGTACGAATAACATGCCCTTTTAAATTTCTTTTTAAGTAAATCAGCTAGAAATTTG  
AATAAACAAATTTGATCCGAT

>RJ

ATTCGTCGGCAGGCGGCTAGCGAGAAAACGTTGTGGCGCATGCGCATGCGCTCGGTTGCGAAAAGTGCACCTGGATTTGAAATTAAGCCACAAG  
AATAACAGAAATCAAACCTCCCCACTTCTGTTTGGCCATTTCTTCGGCTGTGCTATCGTATTTTCAATTCGCCCTCGTGCCTGAAAACCGTAGG  
CATCGCCATTCCAGTACTCTTCAAATATTCGTCGCGGAACTGCAGAGCTCTTTGGTTATGCAAAAAGACTCCGAAAATAACAAACAAACAGGCA  
CAAAAACATAAATAAACGCTGGTGGAGCCAAAGACAAACGAATCACGTCGCTGCAGCTGGTCAAGTGAATTTTTCTTTCGTAATGAAAATCAAAC  
ATTTATCCGGGCAAGCCGTCGATGCGAGTCTCTGCTGGAGGGCAGCAGTGCATGGTGGCTGTACGAGGCAATTTGGCTGAGGGCTGCGAATCA

GCCCGCCGCTCCAGCCACAACGGGCACCAAATTGAGCAGGCAGAGCAGCTCCGCCGCGAGCAGTTTCCTCATCGAGGGGCATCTCCGCCCTGAGCAAG  
TACCAAATGACCCCTGGAGAATATCCGGCAGCTGGAGCTGCAGTTCGCGTGACAAACGCATAGCCAGCAGCAGATTAAGGAACTCAGCGGCTACAGACCAT  
CGGCATCGAGCATCATCAGCAGCAGAGATGCATAACGTTTGGGTGGCCGAGGATCAGGATCAGGAACACGAAGAACTGGAAAGATGCTCCGGAGGG  
AAAGGAGAAAGTTGGTGTATCCAGGAACCCCTGCAGTTAACCCATATGTCTGGATCCGACGGAGAGACCAAGGGTTCCAGACCCCGGCAACAG  
TTCTCCGTGAAACCGCCTTCCTTGCCTGCTCCCAAACCATGTGCAACCCGCGAGTTATGCCACCTTGAGATCGCCGCCGAAATCAAGGAAATC  
TTAGCAAAAGTTCTCCGCTACTCCACATTTCTCTCGGCTGCAGAGGATTTCCAGGATCAAGTAGTGATCTGCCAACAGCCACAGAGACTGATGGC  
TCCGCCACCCAGAGAACCCTCCGGAGCCACCAAAAGGGTATCGAAACCCCTGAGCAGATCGCAAACTTCGGTTCCAGGGTACGCCACGGTTAGG  
ATGCCCAACAGACCACTTCGTTCCAGCAGAAGTGTGGCCAGGTTAGGGATTCCAACCCCTCCAGAGACGTCTCAGTTTGGAGCAGGCCATCGAGG  
GACTCAAATTGGAGGGGAGAAGGCTGTTCGTGAGAAGAGTCCACAAATTTACCAGCTGCCAGCAGTAATGGCAGCTCAAGGATCTCAACGGGGA  
GGTTTTCTGTATCCCACGACCCCGCTCATCGTTCCAGTGCACACATATGCCCGTGCAGCAGGACGGGAAATCTCAAGGAGCAATCCAGCGGTGGA  
CAGGAGGAGAAGCAGAGAAGGTTAAGGGTGAAGGATTTCTATGTTTTAAGTCCAGTATAGTACTATTATCAATAGGATAGGACAGC  
ATTATGATATGATTAACCAATGATTTTAATAAAATTTCTCAGCAGACACATCATGGAGGTTTCCCGCAGGGCAAGTACCTCCACATTTGTCGGG  
AGCGAAGTCTTGGCGAATTTGGCGATCCTGTACAACCTGCCAGCGGACGGCGACCATCACCGGATCACCGAGTGCAACCTGTGGCCATCGAGCGC  
CAGTGCTTCCAGACCATCATGATGCGAAGCGGCTGATCCGGCAGGCGGAATACAGCAGTTTCTCAAGAGTGTGCCATCTTTAAGACCTGGCGG  
AAGACACGCTCATCAAAATCTCCGATGTCTTGGAGGAGCAGCACTACCAGCGTGGCGACTACATAGTCCGCCAGGGCGCCGAGGCGATACCTTCTT  
CATCATCTCCAAGGAAAAGTGGGAGTGCAGTCAAGCAGCAGGACGGCCAGGAGGAGAAGTTCATTCGCATGTCTGGGCAAGGGGATTTCTTTGGA  
GAGAAGGCTCTCCAGGGCGATGATCTGCGCACGGCAATATTTATTTGCGAGTCCGCCGATGGCGTCACTTGTCTGGTTCATCGATCGCGAGACCTTCA  
ATCAGCTAATTTCCAATCTGGACGAGATCAAGCATCGTACGACGACGAGGGCGCCATGGAACGCAGAAAAGTCAACGAGGAAATCCGGGCAATCAA  
CCTCACAGATCTCGGTGTCATCGCAACCCTTGGAGTTGGAGTTTCGGTCCGCTAGAGCTGGTCCAAACCAATGGAGATAGCTCCAGTCTTTCCTTTC  
CTCAAGCAGATGAAAGTCAAGCTCGTGCAGACGCGTCCAGCAGACACATCATGTCGAGAAGGAGATCATGGGCGAGGCCAATTTGCCAGTTCA  
TCGTGAAGCTGTTCAAGACCTTCAAGGACAAGAAGTACCTGTACATGCTAATGGAGAGTTGCCGTTGGTGGAGAGCTCTGGACGATTCTACGGGACAA  
GGCAACTTCGACGACAGCACCACCCGCTTCTACACGGCATGTGTGGTGGAGGCTTTGATTACTTGCCTCGCTAACATCATCTACCGCATCTT  
AAGCCGGGAGAACTGTCTCAATGAACGGGGATATGTGAAGTGGTGGACTTTGGCTTTGCCAAGAAGCTGCAGACGGGCAAGGAGACCTGGACTT  
CTCGCGCATCAAGGAAAAGTGGGAGTGCAGGTTCAAGCAGCAGGACGGCCAGGAGGAGAAGTTCAGTCCGATGCTGGTGGGCAAGGGGATTTCTTTGGA  
GCTGCTTACTGGTACCCCTCCATTCACGGGCTCGGATCCCATGCGCACCTACAACATTAACCTTAAGGGCATCGACGCCATCGAATTTCCAAGGAAT  
ATCACCCCAATGCCAGCAACCTGATCAAGAAGCTCTGTGCGGATAATCCAGCCGAGCGTTTGGGCTACCAGCGTGGGGGAATCAGCGAGATCCAAA  
AGCACAATGGTTCGATGGCTCTTATTTGGTGGGGCTGCAGAACTGCACCCTGGAACCCGCCATTAAGCCCGCGTAAAAGCGTAGTGGATAACA  
AAACTTTGATGACTATCTCCGATCTCCGAGTCCGCGCTCCGCGCAGCAGTGCATGATGCTACTGGGACAAGGACTTCTGAGTGGGCAAGGACTTCCAGCCCGTTCC  
TAGACGATGCTCTTAAACGCTTCTGCTGCAGAAAACCAGGAGGATATGAAAGCCAGGGAGGAAAATTTGATCTTAAGTGCGCCATATGTACGCCAA  
AGCCAACAGCAACAGTACGACGCTCGCATCGAAAAGCTGCCACAAAAAACAAGAAACCTAGCAGTCCGCAAGGTCAGGGCCGACACAAAAGCA  
CAATCATCCATCGTGTAGTCCATTTGAGATTTATAGATACGCTCTCCGTGATGTTATAACCATGATGTGCAACGCAATGAATTTATTAACAGATTT  
ATAACTATTATTTATAATGAGGATATATGTGTCTAGTTCGCTGGAATTTGATGATAAATTTAAGTAGGTTCTGTGACTCTGTTTCAGAGCTCTGTTA  
GCCATGTGCATTTGATAAAATTCAGTATTTGTATCTATTAATATTTTAAACATAATTTATACACATCATTTGTTAAAGCATACAAATCGGGTTGCCT  
TATAGTCTGTAAGAGAACATTTGAAAGCAACATTTGACCAAGATCTTCCGTACACATTTCTTAAATTTCTATGTGGCTCTCTACTGTCTTTCATT  
AGTCTTAGCGATCATGTCTATTATATGTACGAATAACATGCCCTTTTAATTTGCTTTTTAAGTAAATCAGCTAGAAAATGAATAACAAATTTGATC  
CGAT

>RK

ATTCGTCCGGCAGGCGGCTAGCGAGAAAACGTTGTGGCGCATGCGCATGCGCTCGGTTGCGAAAAGTGCACCTGGATTTGAAATTAAGCCACAAG  
AATAACAGAAATCAAACCTCCCCACTTCGTGTTTGGCCATTTCTTCGGCTGTCGTATCGTGATTTTCAATTCGCCCTCGTGCCTGAAAACCGTAGG  
CATCGCCATTTCCAGTGTACTTCAAATATTTCCGTGCGCGAAACTGCAGAGCTCTTTGGTTATGCAAAAGACCTCCGAAAATAACAACAACAGGCA  
CAAAAACATAAACTAAACGCTGGTGGAGCCAAAGACAACAACTCACGTCTGCTGAGTGGTCAAGTAAATTTTCTTTCGTAGTAAAATCAAAC  
ATTTATCCGGGCAAGCCGTCGATGCGAGTCTCTGCTGGAGGCGAGCAGTGCATGGTGGCTGTACAGAGGCCAATTTGGTGAAGGCTGCGAATCA  
GCCCGCCGCTCCAGCCACAACGGGCACCAAATTTGAGCAGGCAGAGCAGCTCCGCCGCGCAGGTTTCTCATCGAGGGCATCTCCGCCCTGAGCAAG  
TACCAAATGACCCCTGGAGAATATCCGGCAGCTGGAGCTGCAGTTCGCGTGACAAACGCATAGCCAGCAGCAGATTAAGGAACTCAGCGGCTACAGACCAT  
CGGCATCGACATCATCAGCAGCAGATGCATAACGTTTGGTGGCCGAGGATCAGGATCAGGACACGAAAGAACTGGAAGATGCTTCGGAGGG  
AAAGGAGAAGTTGGTATGTTCCAGGAACCCCTGCAGTTAACCACTATGCTTGGATTCGCTGGAATTCGAGTCCGAGGAGAGACCAAGGGTTCCAGCCCGGCAACAG  
TTCTCCGTGAAACCGCCTTCCTTGCCTGCTCCCAAACCATGTGCAACCCGCGAGTTATGCCACCTTGAGATCGCCGCCGAAATCAAGGAAATC  
TTAGCAAAAGTTCTCCGCTACTCCACATTTCTCTCGGCTGCAGAGGATTTCCAGGATCAAGTAGTGATCTGCCAACAGCCACAGAGACTGATGGC  
TCCGCCACCCAGAACCCGCTCCGGAGCCACCAAAAGGGTATCGAAACCCCTGAGCAGATCGCAAACTTCGGTTCCAGGCTACGCCACGGTTAGG  
ATGCCCAACAGACCAATCTGTTCCAGCAGAAGTGTGGCCAGGTTAGGGATTTCAACGCCCTCCAGAGACGCTCATGTTTGGAGCAGGCCATCGAGG  
GACTCAAATTGGAGGGGAGAAGGCTGTTCGTGAGAAGAGTCCACAAATTTACCAGCTGCCAGCAGTAATGGCAGCTCAAGGATCTCAACGGGGA  
GGTTTTCTGTATCCCACGACCCCGCTCATCGTTCCAGTGCACACATATGCCCGTGCAGCAGGACGGGAAATCTCAAGGAGCAATCCAGCGGTGGA  
CAGGAGGAGAAGCAGAGAAGGATGGACGCGTGGAGGTTTCCCGCAGGGCAAGTACCTTCCACATTTGTCGGGAGCGAAGGTTCTTGGCGAATTTGG  
CGATCTGTACAACCTGCCAGCGGACGGCGACCATCACCGCATCAGGAGTGCACCTGTGGGCCATCGAGCCCAAGTCTTCCAGCCATCATGAT  
GCGAACGGGCTGATCCGGCAGGCGGAATACAGCGATTTCTCAAGAGTGTGCCATCTTTAAAGACCTGGCGGAAGACACGCTCATCAAATCTCC  
GATGCTTGGAGGAGACGCACTACCAGCGTGGCGACTACATGTGCGCCAGGCGCCCGAGGGCATACCTTCTTTCATCTCTCAAGGAAAAGTGC  
GAGTGACATCAAGCAGCAGGACACGCGAGGAGAAGTTCAATTCGATGCTGGGCAAGGGGATTTCTTGGAGAGAAGGCTCTCCAGGGCGATGA  
TCTGCGCAGCGGCAATATATTTCGAGTCCGCGGATGGCGTCAAGTGTCTGTTGTCATCGATCGCGAGACCTTCAATCAGCTAATTTCCCAATCTGGAC  
GAGATCAAGCATCGTACGACGACGAGGGCGCCATGGAACGCAGAAAGATCAACGAGGAATTTCCGGGACATCAACCTCACAGATCTGCGTGTCTCG  
CAACCTTGGAGTTGGAGGTTTTCGGTCCGCTAGAGCTGGTCCAAACCAATGGAGATGCTCCAGGTTCTTTGCCCTCAAGCAGATGAAAAGTTCACA  
GATCGTGGAGACGCGTACGACGACACATCATGTCCGAGAAGGATCATGGGCGAGGGCAATTTGCCAGTTCATCTGTAAGCTGTTCAGACCTTC  
AAGGACAAGAAGTACTCTGATGCTAATGGAGAGTTTCCGTCAGGATCTGAGGATCTGAGGATCTTACGGGACAAGGGCAACTTCAGCCAGCAGCA  
CCCGCTTCTACACGGCATGTGTGGTGGAGGCTTTGATTACTTGCCTCGCTAACATCATCTACCGCATCTTAAAGCCGAGAACCTGCTGCTCAA  
TGAAACGGGATATGTGAAGCTGGTGGACTTTGGCTTTGCCAAGAAGCTGCAGACGGGCAAGGAGACCTGGACTTTCTCGGCACTCCAGAGTACGTG  
GCTCCCGAGGTTGATTTCAACCGGGGCCACGACATCAGTGGGATTTACTGGTCCGCTGGGAGTGTCTGTTCCGAGCTGCTTACTGTTACCCCTCCAT  
TCACGGGCTCGGATCCCATGCGCACTACAACATTAATACTTAAGGGCATCGAGCCATCGAATTTCCAAAGGAATATCACCCGCAATGGCAGCAACCT  
GATCAAGAAGCTCTGTGCGGATAATCCAGCCGAGCGTTTGGGCTACCAGCGTGGGGGAATCAGCGAGATCCAAAAGCACAATGGTTTCGATGGCTTC  
TATTTGGTGGGGCTGCAGAACTGCACCTGGAACCCGCCATTAAGCCCGCGTGAAGGAGCTAGTGGATACAACAACCTTTGATGACTATCTCCCG  
ATCCTGAGGGTCCGCCGAGATGATGTCACTGGATGGGACAAGGACTTCTGAGGAGAATCAGAACCCGTTTCTTAGCAGATGCTCTTAAACGCTT

CTGCTGCAGAAAACCAGGAGGATATGAAAGCCAGGGAGGAAAAATGATCTTAAAGTGCGCCATATGTACGCCAAAGCCAACAGCAACAGTTCAGCAGC  
TCCGATCGAAAAGCTGCCACAAAAAACAAGAAACGTAGCAGTCCGCAAGGTCAAGGGCCGACACAAAAGCACAATCATCCATCGTCGTAGCTCC  
ATTTGAGATTTATAGATACGCTCCCGTATGTTATAACCATGATGTGCAACGCAATGAATTTATTAACGAGTTTATAACTATTATTTATAAAATGAGG  
ATATATGTGCTFAGTTTCGCTTGGAAATGATGTAATTTGTAAGTAGGCTGTGACTCTGTTTTCAGAGCTCTGTTAGCCATGTGCATTGTATAAAATTC  
GCTATTTGTATCTATTAATATTTTTAACATAAATATTACACATCATTGTTAAAGCATACAAATCGGGTTGCCTTATAGTCTGTAAGAGAACATTTG  
AAAGCAACATTTGACCAAGATCTCCGTCACACATTTCTTAAATTTCTATGTGGCCTCTACTGTCTTTCATTAGTCTTAGCGATCATGTCTATTA  
TATGTACGAATAACATGCCCTTTAATTGTCTTTTTTAAAGTAAATCAGCTAGAATTAATAAACAATTTGATCCGAT

>RL

AGTCTGTTGGAATTTCTCGTGGTGTGCGGTTGTCGTTTGTGCGGATCGTGCTTGAATGACTTTAGCGGCATTTTTATAAGAATCAATGCAACGCG  
TGTTTTCTCGCAAAATTTGGCACAAGTTCTTAATAAAAAGAAAAAATAATATATATATGCGATTGGCGTTTATCACAAATAATCCACATCGCCAT  
TTAGTTCCGGCGGTTTTTCATCGACTTGTGCTTGTGTGCGTCCACTTGAACCGCAACGCAAGTGGAAAGACTCGAGAAAACAAAAGTGCAGGCCG  
TCTAAATTTGATGGCGAAGTTTCCGTGTGCCGCTGCATTTCAATTTATAAATATATTTTCGGCTTAATTTCTGTGCTTCTGTGAATTAACGAGGAAAC  
TGAAGAGTGCAGCGAGCAGACGCCGATCACAAATCAACAAGTGGAAACGAGCAATTTCTTCGCAAAAGCCGGCTGATCGCAACACAAGAAAGAA  
AAGAGAGCGATTTCTGCGACTGGAACCATAACTTTACATCGCCCCGGAATTTCTTCACTTTTCGTCACACATCTCCCGTGAACCTATCAAGGCT  
GCCATATGGAATAATGATTTTCATGAAGAATCTGGATCTGACGCGAGATCCGCGAGATCGTTGACTGCATGTATCCGGTTAAGTATCCAGCCAAGAATC  
TGATCATCAAGGAGGAGATGTCCGAAGCATCGTTTATGTCTATGGAAGATGGACGCGTGGAGGTTCCCGCGAGGGCAAGTACCTCTCCACATTTGC  
GGAGCGAAGGCTCTCCAGGCGGATGATCTGCGCACGGCGAATATTATTTGCGAGTCCGCCGATGGCGTCAAGTTGTCTGGTCACTCGATCGCGAGACCT  
CGCCAGTGTCTCCAGACCATCATGATGCGAACGGGCTGATCCGGCAGGGGAATACAGCGATTTCCCAAGAGTGTGCCATCTTTAAAGACCTGG  
CGAAGACACGCTCATCAAAATCTCCGATGTCTTGGAGGAGACGCACTACCAGCGTGGCGACTACATAGTGCGCCAGGGCGCCGAGGCGATACCTT  
CTTCATCATCTCCAAGGAAAAGTGCAGGTGACGATCAAGCAGCAGGACACGCGAGGAGGAAGTTTCAATTCGATGCTGGGCAAGGGGATTTCTTT  
GGAGAAAGGCTCTCCAGGCGGATGATCTGCGCACGGCGAATATTATTTGCGAGTCCGCCGATGGCGTCAAGTTGTCTGGTCACTCGATCGCGAGACCT  
TCAATCAGCTAATTTCCAATCTGGACGAGATCAAGCATCGCTACGACGACGAGGGCGCCATGGAAACGAGAAAGATCAACGAGGAATTCGGGACAT  
CAACCTCACAGATCTGCGTGTCTATCGCAACCCCTGGAGTTGGAGGTTTCGGTTCGCGTAGAGCTGGTCCAAACCAATGGAGATAGCTCCAGGTCCTTT  
GCCCTCAAGCAGATGAAAAGTCAAGATCGTGGAGACGCGTCAAGCAACACATCATGTCCGAGAAGGAGATCATGGGCGAGGCCAATGGCCAGT  
TCACTCGTGAAGCTGTTCAGAACCTTCAAGGACAAAGAGTACCTGTACATGCTAATGGAGAGTTGCTTGGTGGAGAGTTCCTGGTGGAGAGTCTGAG  
CAAGGGCAACTTCGACGACAGCACCCCGCTTCTACACGGCATGTGTGGTGGAGGCTTTGATTACTTGCCTCGGTAACATCATCTACCCGCGAT  
CTTAAGCCGGAGAACCTGCTGCTCAATGAACGGGGATATGTGAAGCTGGTGGACTTTGGCTTTGCCAAGAAGCTGCAGACGGGCGAGGAAGACCTGGA  
CTTTCTGCGGCACTCCAGAGTACGTGGCTCCCGAGGTGATTTCAACCGGGGCCACGACATCAGTGGCGATTACTGGTTCGCTGGGAGTGTCTATGTT  
CGAGCTGCTTACTGTTACGCCCTCCATTACGGGCTCCGATCCGATCCGACCTTACAACATTTACTTAAAGGCGATCGACGCCATCGAATTTCCCAAGG  
AATATCACCCGCAATGCCAGCAACCTGATCAAGAAGCTCTGTGCGGATAATCCAGCCGAGCGTTTGGGCTACCAGCGTGGGGGAATCAGCGAGATCC  
AAAAGCACAATGGTTCGATGGCTTCTATTGGTGGGGCTGCAGAATGCACCTGGAAACCGCCATTAAGCCCGCGGTGAAAAGCGTAGTGGATAC  
AACAAACTTTGATGACTATCTCCCGATCTGAGGGTCCGGCAGGATGATGTCACTGGATGGGACAAGGACTTCTGAGGAGAATCAGAACCCTGTT  
TCCTAGACGATGCTCTTAAACGCTTCTGTGCGAATAAACCCAGGAGATATGAAAGCCAGGGAGGAAAATTTGATCTTAAAGTGGCCATATGTCACG  
CAAGGCCAACAGCAACAGTCAAGCAGCTCGCATCGAAAAGCTGCCAATAAAAAAACAAGAAACGTCAGAGTGCAGAGGTCAGAGGCGCACAAAA  
GCACAATCATCCATCGTGTAGCTCCATTTGAGATTTATAGATACGCTCTCCGTGATGTTATAACCATGATGTGCAACGCAATGAATTTATTAACGAG  
TTTATAACTATTTATTAATGAGGATATATGTGTCTAGTTTCGCTTGGAAATTTGATGTAATTTGTAAGTAGGCTGTGACTCTGTTTCAGAGCTCTG  
TTAGCCATGTGACTTCAAAATTTAGCTATTTGATCTAATTTTAAATTTTAAATTTTAAATTTTAAATTTTAAATTTTAAATTTTAAATTTTAAATTT  
CCTTATAGTCTGTAAGAGAACATTTGAAAGCAACATTTGACCAAGATCTTCCGTACACACTTTCTTAAATTTCTATGTGGCCTCTCTACTGTCTTT  
ATTAGTCTTAGCGATCATGTCTATTATATGTACGAATAACATGCCCTTTAATTGTCTTTTTTAAAGTAAATCAGCTAGAATTAATAAACAATTTG  
ATCCGAT

>RM

AGTCTGTTGGAATTTCTCGTGGTGTGCGGTTGTCGTTTGTGCGGATCGTGCTTGAATGACTTTAGCGGCATTTTTATAAGAATCAATGCAACGCG  
TGTTTTCTCGCAAAATTTGGCACAAGTTCTTAATAAAAAGAAAAAATAATATATATATGCGATTGGCGTTTATCACAAATAATCCACATCGCCAT  
TTAGTTCCGGCGGTTTTTCATCGACTTGTGCTTGTGTGCGTCCACTTGTCTCCCGTGAACCTATCAAGGCTGCCATATTGGATAATGATTTTCATGA  
AGAATCTGGATCTGACGCGAGATCCGCGAGATCGTTGACTGCATGTATCCGGTTAAGTATCCAGCCAAGAATCTGATCATCAAGGAGGAGATGTCCG  
AAGCATCGTTTATGTCTATGGAAGATGGACGCGTGGAGGTTCCCGCGAGGGCAAGTACCTCTCCACATTTGTCGGGAGCGAAGGTCCTTGGCGAATG  
CGACTCTGTACAACCTCCAGCGACGCGACCATCCGCGCATCCGACCTACCGAATTTGCTGCTGCTGCTGCTGCTGCTGCTGCTGCTGCTGCTGCTGCT  
TGCGAACGGGCTGATCCGGCAGGGGAATACAGCGATTTCCCAAGAGTGTGCCATCTTTAAAGACCTGGCGGAAGACACGCTCATCAAAATCTC  
CGATGCTTGGAGGAGACGCACTACCAGCGTGGCGACTACATAGTGCGCCAGGGCGCCGAGGCGATACCTTCTTCATCATCTCCAAGGAAAAGTG  
ATCTGCGCACGGCGAATATTATTTGCGAGTCCGCCGATGGCGTCAAGTTGTCTGCTGCTGCTGCTGCTGCTGCTGCTGCTGCTGCTGCTGCTGCTGCT  
CGAGATCAAGCATCGCTACGACGACGAGGGCGCCATGGAAACGAGAAAGATCAACGAGGAATTCGGGACATCAACCTCACAGATCTGCGTGTCTATC  
GCACCCCTTGGAGTTGGAGGTTTCGGTTCGCGTAGAGCTGGTCCAAACCAATGGAGATAGCTCCAGGTCCTTTGCCCTCAAGCAGATGAAAAGTCC  
AGATCGTGGAGACGCGTCAAGCAACACATCATGTCCGAGAAGGAGATCATGGGCGAGGCCAATTTGCCAGTTCATCGTGAAGCTGTTCAAGACCTT  
CAAGGACAAGAAGTACCTGTACATGCTAATGGAGAGTTGCTTGGTGGAGAGCTCTGGACGATTTACGCGCAAGGGCAACTTCGACGACAGCAGC  
ACCCGCTTCTACACGGCATGTGTGGTGGAGGCTTTGATTACTTGCCTCGGTAACATCATCTACCCGCGATCTTAAAGCCGAGAACCTGTGCTCA  
ATGAACGGGGATATGTGAAGCTGGTGGACTTTGGCTTTGCCAAGAAGCTGCAGACGGGCGAGGAAGACCTGGACTTTCTGCGGCACTCCAGAGTACCT  
GGCTCCCGAGGTGATTTCAACCGGGGCCACGACATCAGTCCGGATTTACTGGTTCGCTGGGAGTGTCTATGTTCCAGAGTGTCTTACTGGTACCCCTCA  
TTACAGGCTCCGATCCATGCGCACCTTACAACATTTACTTAAAGGCACTCGACGCCATCGAATTTCCAAAGGAATATCACCCGCAATGCCAGCAAC  
TGATCAAGAAGCTCTGTGCGGATAATCCAGCCGAGCGTTTGGGCTACCAGCGTGGGGGAATCAGCGAGATCCAAAAGCACAATGGTTCGATGGCTT  
CTATTGGTGGGGCTGCAGAATGCACCTGGAAACCGCCATTAAGCCCGCGGTGAAAAGCGTAGTGGATACAAACAACTTTGATGACTATCTCC  
GATCTGAGGGTCCGCCGCGAGATGATGTCACTGGATGGGACAAGGACTTCTGAGGAGAATCAGAACCCTTTCTAGACCATGCTCTAAACGCT  
TCTGTGCGAATAAACCCAGGAGATGTAAGAAACCCAGGAGATGTAAGTGGCCATATGTAAGTGGCCATATGTAAGTGGCCATATGTAAGTGGCCATATG  
CTCGCATCGAAAAGCTGCCAATAAAAAAACAAGAAACGTCAGAGTGCAGAGGTCAGAGGTCAGAGGTCAGAGGTCAGAGGTCAGAGGTCAGAGGTC  
CATTGAGATTTATAGATACGCTCTCCGTGATGTTATAACCATGATGTGCAACGCAATGAATTTATTAACGAGTTTATAACTATTTATTAATGAG  
GATATATGTGTCTAGTTTCGCTTGGAAATTTGATGTAATTTGTAAGTAGGCTGTGACTCTGTTTCAGAGCTCTGTTAGCCATGTGCATTTGATAAATTC  
AGCTATTTGATCTATTAATAATTTTTAACATAAATTTATACACATCATTGTTAAAGCATACAAATCGGGTTGCCTTATAGTCTGTAAGAGAACATTT





GCTCGGCTGTAATTATGTTGAAAGAGATCGGGAACGCTTCGTGTTAATTTCTTTGAACTGCTCGCAAATTTCTGGAATAAAGTGAATAAAAGTGA  
AAGTGAATTTCTTAAGCACTCGCATTAAAGTGAAGGAAATAAGCTTAAAAACACCCACGGACTTAAAGAGAATGAGACGCAGAAACGGAGACTTGGAT  
TTTGCTCTTTTCTCGAATTGAACGCAAGATCACTTGAAGAATTCGGATGGACGGTGGAGGTTTCCCGCGAGGGCAAGTACTCTCCACATGTGTC  
GGGAGCGAAGGTCCTTGGCGAATTGGCGATCCTGTACAACTGCCAGCGGACGGCGACCATCACCGCGATCACCGAGTGAACCTGTGGCCATCGAG  
CGCCAGTGTCTCCAGACCATCATGATGCGAACGGCCCTGATCCGGCAGGCGGAATACAGCGATTTCTCAAGAGTGTGCCATCTTTAAAGACCTGG  
CGGAAGACACGCTCATAAAAATCTCCGATGTCTTGGAGGAGACGCACTACCACGCTGGCGACTACATAGTGGCCAGGGCGCCGAGGCGATACCTT  
CTTCATCATCTCCAAGGAAAGTGGAGTGCAGATCAAGCAGGACACCGAGGAGGAGAAGTTTCAATTCGCATGCTGGGCAAGGGGATTTCTTT  
GGAGAGAAGGCTCTCCAGGGCGATGATCTGCGCACGGGAATATTATTGCGAGTCCGCCGATGGCGTCAGTTGTCTGGTCAATCGATCGCGAGACCT  
TCAATCAGCTAATTTCCAATCTGGACGAGATCAAGCATCGCTACGACGACGAGGGCGCCATGGAACGCAGAAAGATCAACGAGGAATTCGGGACAT  
CAACCTCACAGATCTGCGTGTCTCGCAACCTTGGAGTTGGAGGTTTCGGTCCGCTAGAGCTGGTCCAAACCAATGGAGATAGTCCAGGTCCTTT  
GCCCTCAAGCAGATGAAAAGTCAAGATCGTGGAGACGCTCAGCAGCAACACATCATGTCCGAGAAGGAGATCATGGGCGAGGCCAATGGCCAGT  
TCATCGTGAAGCTGTTCAAGACCTTCAAGGACAAGAAGTACCTGTACATGCTAATGGAGAGTTGCCTGGTGGAGAGCTTGGACGATTTACGGGA  
CAAGGGCAACTTCGACGACAGCACCCACCGCTTCTACACGGCATGTGTGGTGGAGGCTTTGATTACTTGCATCGCGTAACATCATCTACCGCGAT  
CTTAAGCCGGAGAACCTGCTGCTCAATGAACGGGGATATGTGAAGCTGGTGGACTTTGGCTTTGCCAAGAGCTGCAGACGGGCGAGGAAGCATGGA  
CTTTCTGGCGACTCCAGAGTACGTGGCTCCGAGGTGATTTCAACCGGGCCACGACATCAGTGGCATTACTGGTCCGTTGGAGTGTCTATGTT  
CGAGTGTCTTACTGGTAAACCTTCAAGGCTCGGATCCCATGGCACCTTACAACATTTACTTAAGGGCATCGACGCCATCGAATTTCCCAAGG  
AATATCACCCGCAATGCCAGCAACCTGATCAAGAAGCTCTGTGCGATAATCCAGCCGAGCGTTTGGCTTACCAGCGTGGGGGAATCAGCGAGATCC  
AAAAGCACAATGGTTCGATGGCTTCTATTGGTGGGGCTGCAGAACTGCACCTGGAACCGCCATTAAGCCCGCGGTGAAAAGCGTAGTGGATAC  
AACAACTTTGATGACTATCTCCCGATCTGAGGGTCCGCGCCAGATGATGCTACTGGATGGACAAGGACTTCTGAGGAGAATCAGAACCCTTT  
TCCTAGAGAGTCTCTCAAAACCTTCTGCTGCAGAAAACCGAGGATATGAAAGCCAGGGAGGAAAAAATTTAGTCTAAAGTCCGATATGTCAGC  
CAAAGCCAACAGCAACAGTCAAGCTCGCATGAAAAGCTGCCACAAAAAACAAGAAACGTCAGAGTGCAGAGTCAAGGTCAGGGCCGACACAAAA  
GCACAATCATCCATCGTGTAGCTCCATTTGAGATTTATAGATACGCTCTCGGTGATGTTATAACCATGATGTCAACGCAATGAATTTATTAACGAG  
TTTATAACTATTTATTTATAATGAGGATATATGTGCTAGTTCTGCTTGGAAATGATGTAATTTGAAGTAGGTCGTGACTCTGTTTTCAGAGCTCTG  
TTAGCCATGTGATGATATAAATTCAGCTATTTGATCTATTAATAATTTTTAACATAAATTTATACACATCATTTTAAAGCATACAATCGGGTTG  
CCTTATAGTCTGTAAGAGAACATTTGAAAGCAACATTTGACCAAGATCTTCCGTCACACATTTCTTAAAATTTCTATGTGGCTCTCTACTGTCTTTC  
ATTAGTCTTAGCGATCATGTCTATTATATGTACGAATAACATGCCCTTTAATTTGCTTTTTTAAAGTAAATCAGCTAGAAATGAAATAACAAATTTG  
ATCCGAT

>RR

ATTCGTCGGCAGGCGGCTAGCGAGAAAACGCTGTGTGGCGCATGCGCATGCGCTCGGTTGCGAAAAGTGCACCTGGATTGAAATTAAGCCACAAG  
AATAACAGAAATCAAACCTCCCCACTTCTGTGTTGGCCATTTCTTCGGCTGTGATCGTGTATTTCAATTCGCCCTCGTGTGTGCTTAACGCCAT  
TTATTGCTATTGTACTGTCCACATTTGTGCTGACTGTCTTTGTCAAAGCTGGTAGATCAACAGGCCATAAACAAAAATCAATCCACAACAGTGAAGC  
AAGTCGCAAAAAACATGGAAGTTTACAACACCGCTCGACGGCAAGAAACGAAACAGCACTGAAACAGCAACAGTGTGTGGCTTTTGAATATAAATA  
ACAAATACATTTATTGTGATTTTGTTCACAAACAACAGGCTGAAAACCGTAGGACTCGCCATTTCCAGTGCATCTCAAATATTCGCTGGCGCAAACT  
GCAGAGCTCTTTGGTTATGCAAAAGACCTCCGAAAATAACAACAACAGGCACAAAAACATAAACTAAACGCTGGTGGAGCCAAAGACAAACGAATC  
ACGTCGCTGCAGTGGTCAAGTGAATTTTCTTTCTGTAATGAAAATCAAACATTTATCCGGGCAAAGCCGTCGATGCGAGTCTCTCGTGGAGGGCA  
GCAGTGCATGGGTGCCCTGTACGAGGCCAATTTGGCTGAGGGCTGCAATCAGCCCGCGCTCCAGCCACAACGGGCAACAAATGAGCAGGCGAGAG  
CAGTCCGCGCGAGCAGTTCCTCATCGAGGGCATCTCCGCGCTGAGCAAGTACCAATGACCCCTGGAGAATATCCGGCAGTGGGCGATGCGATCG  
CGTGACAAAACGCATAGCAGCACGATTAAGGAACCTCAGCGGCTACAGACCATCGGCATGCGAGCATCATCAGCAGCAGCAGATGCATAACGTTTGGG  
TGGCCGAGGATCAGGATCAGGAACACGAAGAACTGGAAGATGCTTCGGAGGGAAGGAGAAGTTGGTGTAGTATCCAGGAACCCCTGCAGTTAACCA  
CTATGCTCGGATCCGACGGAGAGCAAGGGTTCCAGACCCCGGCAACAGTTCCTCGTGAACCCGCTTCTCTGCTCGCTCCCAACACATGTCG  
CAACCCCGGATTTAGCAGCTTTGAGATCGCCGCGAAATCAAGGAAATCTTAGCAAAAAGTTCTCCGCTACTCTCCACATTTCTCTCGGCTGAC  
AGGATTTCCAGGATCAAGTAGTGTCTGCCAACAGCAACAGACTGATGGTTCGCGCACCCAGAGAACCCTCCGAGGCCACCCAAAAGGGTATC  
GAAACCCCTGAGCAGATCGCAACTTCCGTTACAGCGGTACGCCACGGTTAGGATGCCAACCCAGACCCTTCTGTTACAGAGAAGTGTGGCCAGGTCT  
AGGGATTTCAACGCCCTCCAGAGACGCTCTAGTTTGGAGCAGGCCATCGAGGACTCAAATTTGGAGGGGAGAAGGCTGTTCTGTCAGAAGAGTCCAC  
AAATTTACCCAGCTGCCAGCAGTAAATGGCAGCTCCAAGGATCTCAACGGGAGGGTTTCTGTATCCCAGACCCCGCTCATCGTTCCAGTGTCCAC  
ATATGCCCGTCGACGCGAGGAAATCTCAAGGAGCAATCCAGCGGTGACAGGAGGAAAGCAGAGAAGGATGATGATGCGGATGGATGGGATTCACCG  
GAGGCAAGTACCTCTCCACATTTGTCGGGAGCGAAGGTCCTTGGCGAATTTGGCGATCTGTACAACTGCCAGCGGACGGGACCATCACCGGATCA  
CCGAGTGCACCTGTGGGCCATCGAGGCCAGTGTCTCCAGCCATCATGATGCAACGGGCTGATCCGGCAGGCGGAATACAGCGATTTCTCAA  
GAGTGTGCCCTTTTAAAGACCTGGCGGAAGACGCTCATCAAATCTCCGATGTCTTGGAGGAGCAGCACTACCAGCTGGGCGACTACATAGTGT  
CGCCAGGGCGCCCGAGGATACCTTCTTTCATCATCTCAAGGAAAAGTGCAGATCGTGGAGACGCGTCAGCAGCAACACATCATGTCCGAGAAGGA  
GCATGCTGGGCAAGGGGATTTCTTTGGAGAGAAGGCTCTCCAGGGCGATGATCTGCGCACGGCGAATATTATTGCGAGTCCGCCGATGGCGTCAG  
TTGTCTGGTTCATGATCCGAGACCTTCAATCAGCTAATTTCCAATCTGGACGAGATCAAGCATCGCTACGACGACGAGGGGCCATGGAACGCAGA  
AAGATCAACGAGGAATCCGGGACATCAACCTCACAGATCTGCGTGTATCGCAACCTTGGAGTTGGAGGTTTCCGCTCGGCTAGAGCTGGTCCAAA  
CCAATGGAGATAAGCTCCAGGTCCTTTGCGCTCAAGCAGATGAAAAGTCAACAGATCGTGGAGACGCGTCAGCAGCAACACATCATGTCCGAGAAGGA  
GATCATGGGCGAGGCCAATTTGCCAGTTCATCGTGAAGCTGTTCAAGACCTTCAAGGACAAGAAGTACCTGTACATGCTAATGGAGAGTTGCCGTTGGT  
GGAGAGCTCTGGACGATTTACGGGACAAGGGCAACTTCGACGACGACCAACCCGCTTCTACACGGCATGTGTGGTGGAGGCGCTTTGATTACTTGC  
ACTCGGTAACATCATCTACCGGATCTTAAGCCGAGAACCTGCTGCTCAATGAACGGGATATGTGAAGCTGGTGGACTTTGGCTTTGCCAAGAA  
GCTGTGACGAGCGGCAAGTGGATACCAAACTTTGATGACTTCTCCGATCTCCGATCTGAGGGTCCGCGCAGATGATGTTCAACCGGGCCACGACATCAGTGGCGAT  
TACTGGTCTGGGAGTGTCTATGTTGAGCTGCTTACTGGTACCCCTCCATTCACGGGCTCGGATCCCATGCGCACCTACAACATTTACTTTAAGG  
GCATCGACGCCATCGAATTTCCAAAGGAATATCACCCGCAATGCCAGCAACCTGATCAAGAAGCTCTGTGCGGATAATCCAGCCGAGGCTTTGGGCTA  
CCAGCGTGGGGGAATCAGCGAGATCCAAAGCACAATGGTTCGATGGCTTATTTGGTGGGGCTGCAGAACTGCACCTGGAACCGCCCATTAAG  
CCCGCTGAAAAGCGTAAAGGATATAAATACTATTTTATAAAGGAGATATGTTGCTAGTTCGCTTGGAAATGATGTAATTTGTAAGTGTGTAAGT  
ACTTCTGAGGAGAATCAGAACCCTTTCTAGACGATGCTCTTAAACGCTTCTGCTGCAGAAAACAGGAGGATATGAAAGCCAGGAGGAAAAAT  
TGATCTTAAGTGCGCCATATGTACGCCAAAGCCAAACAGCAACAGTCAAGCTGCGATCGAAAAGCTGCCACAAAAAACAAGAAACGTAAGCAG  
TCGCAAGGTCAGGGCCGACACAAAAGCACAATCATCCATCGTGTAGCTCCATTTGAGATTTATAGATACGCTCTCCGTCGATGTTATAACCATGATG  
TGCAACGCAATGAATTTATTAACGAGTTTATAACTATATTTTATAAAGGAGATATGTTGCTAGTTCGCTTGGAAATGATGTAATTTGTAAGTGTG  
GTCTGTGACTCTGTTTTCAGAGCTCTGTTAGCCATGTGCATTTGATAAATTCAGCTATTTGATCTATTAATAATTTTTAACATAAATTTATACACATC  
ATGTTAAAGCATACAAAATCGGGTTGCCTTATAGTCTGTAAGAGAACATTTGAAAGCAACATTTGACCAAGATCTTCCGTCACACATTTCTTAAAAT



GTCTGTAAGAGAACATTTGAAAGCAACATTTGACCAAGATCTTCCGTACACATTTCTTAAAAATCTATGTGGCCTCTCTACTGCTTTTCATTAGTC  
TTAGCGATCATGTCTATTATATGTACGAATAACATGCCCTTTTAAATGTCTTTTTTAAAGTAAATCAGCTAGAAATGAATAAACAAATTTGATCCGAT

>RU

ATTCGTCCGGCAGGGCGGTAGCGAGAAAACGTGTGTGGCGCATGCGCATGCGCTCGGTTGCGAAAAGTGCACCTGGATTGAAATTAAGCCACAAG  
AATAACAGAAATCAAACCTCCCCACTTCGTGTTGGCCATTTCTTCGGCTGTCGTATCGTGATTTTCAATTCGCCCTCGTGTGTGCTAACGGTAT  
TATAGAGCATTTTGCATATGGCAACCGTCCAGTGAATTAATAATAAAAGCCACAACCAGACAATTACCATGCCTTGGCATATGCCTTTGAGCT  
ATTTCCAACAATAATGCTTACATAAATAGCAGCTCTGGTTGATGTTCTAAATAGCAAGTAAACAAAACCCGACAATTTTCCATGCTCGGTTTTTCC  
GCTCGGCTGAATTAATGTTGAAAGAGATCGGGAAACGCTTCGTGTTAAATTTCTTTGAACTGCTCGCAAATTTCTGGAATAAAGTGAATTAAGGTGA  
AAGTGAATTCCTTAAGCACTCGCATTAAGTGGGAAATAAGCTTAAAAACACCCACGGACTTAAAGAGAATGAGACGCGAGAACCAGGAGACTTGGAT  
TTTGCTCTTTTTCTCGAATTGAACGCAAAAGATCACTTGAAGAAATCCGGCATCGCCATTTCCAGTGACTCTTCAAATATTCCTGCGCGAACTGCA  
GAGCTCTTTGGTTATGCAAAAAGACCTCCGAAAATAACAACAACAGGCACAAAACATAAACTTAAACGCTGGTGGAGCCAAAGACAACGAATCACG  
TCGCTGCAGCTGGTCAAGTGAATTTTTCTTTCTGTAATGAAAATCAACATTTACCGGGCAAGCCGTCGATGCGAGTCTCTCGTGGAGGGCAGCA  
GTGCCATGGGTGCCCTGTACGAGCCAAATTTGGTGGAGGCTCGGAATCAGCCCTCCGCTCCAGCCACAACGGCACCACCAATGAGCAGGACGAGCAG  
CTCCGCCGGCAGCAGTTTCTCATCGAGGGCATCTCCGCCCTGAGCAAGTACCAATGACCCGAGGAAATATCCGGCAGCTGGAGCTGCAGTCCGCT  
GACAAACGCATAGCGAGCAGATTAAGGAACTCAGCGGCTACAGACCATCGGCAGTGCAGCATCATAGCAGCAGCAGATGCATAACGTTTGGGTGG  
CCGAGGATCAGGATCAGGAACACGAAGAAGTGAAGATGCTTCGGAGGAAAGGAGAGTGGCTAGTATCCAGGAACCCCTGCAGTTAACCACTA  
TGTCCTGATCCGACGAGACCAAGGTTCCAGACCCCGGCAACAGTTCTCCGTAAGAACCGCTTCCCTTGGCTGCGTCCCAAGCATGCGCAAA  
CCGCCAGTTATGCCACCTTGAGATCGCCGCCGAAAATCAAGGAAAATCTTAGCAAAAGTTCTCCGCCCTACTCCACATTTCTCTCGGCTGCAGAGG  
ATTTCCAGGATCAAGTAGTGATCTGCCAACAGCCACAGAGACTGATGGCTCCGCCACCAGAGAACCCCTCCGGAGCCACCCAAAAGGGTATCGAA  
ACCCCTGAGCAGATCGCAAACTTCGGTTTCAGCGGTACGCCAGGTTAGGATGCCAACCCAGACCACTTCGTTTCAGCAGAAAGTGGCCAGGCTTAGG  
GATTTCCAAACCTTCCCGCAGTCTCAGTTTGGAGCAGGCCATCGAGGACTGCAAAATTTGGAGGGGAGAAGGCTGTTCGTCAGAGGATCCACAAA  
TTTCACCAGCTGCCAGCAGTAATGGCAGCTCCAAGGATCTCAACGGGGAGGGTTTCTGTATCCACAGACCCCGCTCATCGTTCCAGTGCACACATA  
TGCCCGTGCAGCAGGACGGGAAATCTCAAGGAGCAATCCAGCGGTGGACAGGAGGAGAAGCAGAGAGGATGGACGCGTGGAGGTTTCCCGCGAG  
GGCAAGTACCTTCCACATTTGTCGGGAGCGAAGGTCCTTGGCGAATTTGGCGATCTCTTACAACCTGCCAGCAGCAGTGCAGGAGGACCACTCCCGGATCACCG  
AGTGCACCTGTGGCCAGTCCAGGCAAGTTCAGACCATCATGATGCGAACGGCCCTGATCCCGCAGGCGGAAATCAGCGGTTTCTCTCAAGAG  
TGTGCCATCTTTAAAGACCTGGCGGAAGACACGCTCATCAAATCTCCGATGTCTTGGAGGAGACGCACTACCAGCGTGGCGACTACATAGTGGC  
CAGGGCGCCGAGGCGATACCTTCTTATCATCTCCAAGGAAAAGTGGCAGTGCAGATCAAGCAGCAGGACACGCGAGGAGAGAAGTTTATTCGCA  
TGCTGGGCAAAGGGGATTTCTTTGGAGAGAAGGCTCTCCAGGGCGATGATCTGCGCACGGCGAATATTTATTTGCGAGTCCGCCGATGGCGTCAAGT  
TCTGGTCACTCGATCGCGAGACCTTCAATCAGCTAATTTCCAATCTGGACGAGATCAAGCATCGCTACGACGACGAGGGCGCCATGGAACCGAGAAAG  
ATCAACGAGGAATTCGGGACATCAACCTCACAGATCTGCGTGTATCGCAACCCCTTGGAGTTGGAGGTTTCCGGTCCGCTAGAGCTGGTCCAAACCA  
ATGGAGATAGCTCCAGGTCCTTTGCCCTCAAGCAGATGAAAAGTGCAGATCGTGGAGACGCGTACGACGCAACACATCATGTCCGAGAAGGAGAT  
CATGGCGAGGCAATTTGCCAGTTTATCGTGAAGTGTTCAGACCTTCAAGGACAAGAAGTACCTGTACATGCTAATGGAGAGTGGCTGGGTGGGA  
GAGCTTGGACGATTTACGGACAAGGGCAACTTGCAGCACCACCCGCTTCTACACGGCATGTGGTGGGAGGCTTTGATTAATTAAGTACTGGACT  
CGCGTAACATCATCTACCGCATCTTAAGCCGGAGAACCTGCTGCTCAATGAACGGGGATATGTAAAGCTGGTGGACTTTGGCTTTGCCAAGAAGCT  
GCAGACGGGCAGGAAGACTGGACTTTCTGCGGCACCTCCAGAGTACGTTGGCTCCCGAGGTGATTTCTCAACCGGGGCCAGCATCAGTGGCGATTAC  
TGGTCCGTGGGAGTGTCTATGTTGAGCTGCTTACTGGTACCCTCCATTCACGGGCTCGGATCCCATGCGCACCTCAACAATATACTTAAGGGCA  
TCGACGGTCCGAATTTCCAGGAATATCACCCGCAATCACCGCAACTGATCAAGAGCTCTGTCCGCAATAATCCAGCGACTTTGGCGTATGCGCAT  
GCGTGGGGAAATCAGCGAGATCCAAAAGCACAAATGGTTTCATGGCTTCTATTTGGTGGGGCTGCAGAACTGCACCCCTGGAACCCGCCATTAAGCCC  
GCCGTGAAAAGCGTAGTGGATACAACAACCTTTGATGACTATCTCCCGATCTGAGGGTCCGCCCCAGATGATGTACTGGATGGGACAAGGACT  
TCTGAGGAGAATCAGAACCCGTTTCTTAGACGATGCTCTTAAACGCTTCTGTGCAGAAAACCCAGGAGGATGAAAGCCAGGGGAAAATTTGA  
TCTTAAGTGGCCATATGATGCCAAAGCCAAACAGCAACCTCAGTACGACTCGCATCGAAAGCTGCCAAAAAAGCAAAAGAACTAGCAGTGC  
CAAGGTCAAGGGCCGACAAAAGCACAAATCTCCATCGTCTGATGCTTCCATTTAGATTTATAGATACGCTCTCCGTGATGTTATAACCATGATGTGC  
AACGCAATGAATTTATTAACGAGTTTATAACTATTATTTTATAATGAGGATATATGTGCTAGTTCCGCTTGGAAATGATGTAATTTGAAGTAGGTC  
TGTGACTCTGTTTCAGAGCTCTGTAGCCATGTGATTTGATAAATTCAGCTATTTGTATCTATTAATATTTTTAACAATAATTTATACACATCATT  
GTTAAAGCATACAACCTGGGTTGCCTTATAGTCTGTAAGAGAACATTTGAAAGCAACATTTGACCAAGATCTTCCGTACACATTTCTTAAAAATCT  
ATGTGGCTCTCTACTGCTTTTCAATAGTCTTAGCGATCATGTCTATTATATGTACGAATAACATGCCCTTTTAAATGTCTTTTTTAAAGTAAATCAG  
CTAGAAATGAATAACAATTTGATCCGAT

>RV

ATTCGTCCGGCAGGGCGGTAGCGAGAAAACGTGTGTGGCGCATGCGCATGCGCTCGGTTGCGAAAAGTGCACCTGGATTGAAATTAAGCCACAAG  
AATAACAGAAATCAAACCTCCCCACTTCGTGTTGGCCATTTCTTCGGCTGTCGTATCGTGATTTTCAATTCGCCCTCGTGTGTGCTAACGGTGG  
TAGATCAACAGGCCATAAAACAAATCAATCCAAAACCTGAGGCAAGTTCGCAAAAACATGGAAGTTTACAACACCGCTCGAGCGCAGAAAACGAAAC  
AGCAACTGAAACAGCAACCGTGTGTGGCTTTTGAATATAAATAACAATAACATTAATTTGTGATTTTGTACCAACAACAGGCTGAAAACCGTAGGC  
ATCGCCATTTCCAGTGACTCTTCAAATATTCCTGCGCGAAAATGCGAGACTCTTTGGTTATGCAAAAAGACCTCCGAAAATAACAACAACAGGCAC  
AAAACATAAACTAAACGCTGGTGGAGCCAAAGACAACGAATCACGTCGCTGCAGCTGGTCAAGTGAATTTTTCTTTCTGTAATGAAAATCAAACA  
TTATCCGGGCAAAGCCGTCGATGCGAGTCTCTCGTGGAGGGCAGCAGTCCATGGGTGCCCTGTACGAGGCCAATTTGGCTGAGGGCTGCGAATCAG  
CCCGCGCTCCAGCCACAACGGGACCAAAATGAGCAGGCAGAGCAGCTCCGCCGGCAGCAGTTTCTCATCGAGGGCATCTCCGCCCTGAGCAAGT  
ACCAAATGACCCCTGGAGAAATATCCGGCAGCTGGAGCTGCAGTGCAGTGCAGCAACGCATAGCGAGCAGCAGATTAAGGAACCTCAGCGGCTACAGACCATC  
GGCACTGCAGCATCATCAGCAGCAGAGATGCATAACGTTTGGGTGGCCGAGGATCAGGATCAGGAACACGAAGAAGTGAAGATGCTTCGGAGGGA  
AAGGAAAGTTGGCTAGTATCCAGGAACCCCTGCAGTTAACCACTATGTCCTGGATCCGACGGAGAGACCAAGGGTTCCAGACCCCGCAACAGT  
TCTCCGTGAAACCCGCTTCTTTGCGTCTCCCAAACCATGTCGCAACCCGCCAGTTATGCCACCTTGGATCGCGCGGAAAATCAAGGAAAATCT  
TAGCAAAAGTTTCTCCGCTACTCCACATTTCTCTCGGCTGCAGAGGATTCAGGATCAAGTAGTGTCTGCCAACAGCCACAGAGACTGATGGCT  
CCGCCACCCAGAGAACCCTCCGGAGCCACCCAAAAGGGTATCGAAACCCCTGAGCAGATCGCAAACTTCGGTTTCAGCGGTACGCCAGGTTAGGA  
TGCCCAACAGACCACTTCGTTTCAGCAGAAGTGTGGCCAGGTTAGGATTCCAACCGCTCCAGAGACTCTCAGTTTGGAGCAGGCTACGAGG  
ACTCAAATTTGAGGGGGAGAAGGCTGTTCTGTCAGAAGAGTCCACAAATTTACACAGCTGCCAGCAGTAATGGCAGCTCCAAGGATCTCAACGGGGAG  
GGTTTCTGTATCCACAGACCCCGCTCATCGTTCCAGTGCACACATATGCCGCTGCAGCAGGACGGGAAATCTCAAGGAGCAATCCAGCGGTGGAC  
AGGAGGAGGAAGCAGAGAAGGATGGACGCGTGGAGGTTTCCCGCAGGGCAAGTACCTTCCACATTTGTCGGGAGCGAAGGTCCTTGGCGAATTTGG  
GATCTGTACAACCTGCCAGCGGACGGCACCATCACCGGATCACCGAGTGCACCTGTGGCCATCGAGCGCCAGTGTCTCCAGACCATCATGATG

CGAACGGGCTGATCCGGCAGGGGAATACAGCGATTTCTCAAGAGTGTGCCCATCTTTAAAGACCTGGCGGAAGACACGCTCATAAAAATCTCCG  
ATGTCTTGGAGGAGACGCACTACCAGCGTGGCGACTACATAGTGCAGGGGGCGCCGAGGGGATACTTCTTTCATCATCTCCAAGGGAAAAAGTGCG  
AGTGACGATCAAGCAGCAGGACACGCAGGAGGAGAAGTTCATTGCGCATGCTGGGCAAAGGGGATTTCTTTGGAGAGAAGGCTCTCCAGGGCGATGAT  
CTGCGCACGGCGAATATATTTTTCGAGTCCGCCGATGGCGTCAAGTTGCTGTCATCGATCGCGAGACCTTCAATCAGCTAATTTCCAATCTGGACG  
AGATCAAGCATCGCTACGACGACGAGGGGCCATGGAACGCAGAAAGATCAACGAGGAATTCGGGGACATCAACCTCAGAGATCTGCGTGTCTCGC  
AACCTTGGAGTGGAGGTTTCGGTTCGGTAGAGCTGGTCCAAACCAATGGAGATAGTCCAGGTCTTTGCCCTCAAGCAGATGAAAAAGTACACG  
ATCGTGGAGACGGTTCAGCAGCAACACATCATGTCCGAGAAGGAGATCATGGGCGAGGCCAATGCCAGTTCATCGTGAAGCTGTTCAAGACCTCA  
AGGACAAGAAGTACCTGTACATGCTAATGGAGAGTTGCCTGGGTGGAGAGCTCTGGACGATTCTACGGGACAAGGGCAACTTCGACGACAGCACCAC  
CCGCTTCTACACGGCATGTGTGGTGGAGGCCTTTGATTACTTGCCTCGCTAACATCATCTACCGGATCTTAAGCCGGAGAACCTGCTGCTCAAT  
GAACGGGGATATGTGAAGCTGGTGGACTTTGGCTTTGCCAAGAAGCTCGACAGGGCAGGAAGACCTGGACTTCTGCGGCACTCCAGAGTACGTGG  
CTCCGAGGTGATTTCAACCGGGGCCACGACATCAGTGCAGTACTTCTGCTGGGAGTGTCTCATGTTTCGAGCTGCTTACTGGTACCCCTCCATT  
CACGGGCTCGGATCCCATGCGCACCTACAACATTATACTTAAGGGCATCGACGCCATCGAATTCCCAAGGAATATCACCCGCAATGCCAGCAACCTG  
ATCAAGAAGCTCTGTCCGATAATCCAGCCGAGCGTTTGGGCTACCAGCGTGGGGGAATCAGCGAGATCCAAAAGCACAATGGTTCCGATGGCTTCT  
ATTGGTGGGGCCTGCAGAACTGCACCCCTGGAACCGCCCATTAAGCCCGCCGTGAAAAGCGTAGTGGATACAACAACCTTTGATGACTATCCTCCCGA  
TCCTGAGGGTCCGCCCCAGATGATGTCACTGGATGGGACAAGGACTTCTGAGGAGAATCAGAACCCGTTTCTTAGACGATGCTCTCTAAACGCTTC  
TGCTGCAGAAAACCAGGAGGATATGAAAGCCAGGGAGGAAAAATTGATCTTAAGTGCGCCATATGTACGCCAAAGCCAACAGCAACAGTCAAGCAGCT  
CGCATCGAAAAGTGCCACAAAAAAAACAAAGAAACGTAGCAGTTCGCAAGGTCAAGGGCCGACACAAAAGCACAATCATCCATCGTCTAGTCCCA  
TTTGAGATTTATAGATACGTCTCCGTGATGTTATAACCATGATGTGCAACGCAATGAATTTATTAACGAGTTTATAACTATTTATTTATAATGAGGA  
TATATGTGTCTAGTTCGCTTGAATTTGATGTAATTTGTAAGTAGGCTGTGACTCTGTTTCAGAGCTCTGTTAGCCATGTGCATTGTATAAATTCAG  
CTATTTGATCTATTAATATTTTAAACATAATTATTACACATCATTGTTAAAGCATACAAAATCGGGTTGCCCTATAGTCTGTAAGAGAACATTTGA  
AAGCAACATTTGACCAAGATCTTCCGTACACATTTCTTAAAATCTATGTGGCCTCTACTGTCTTTCATTAGTCTTAGCGATCATGTCTATTAT  
ATGTACGAATAACATGCCCTTTTAATTGCTTTTTTAAGTAAATCAGCTAGAATTAATAAACAATTTGATCCGAT
