# Supplementary material
Source: PubMed Central journal article supplement (PMC5289850)
Supplement: 761FileS1.pdf [file 761FileS1.pdf]

## Feeding-related traits are affected by dosage of the *foraging* gene in *Drosophila melanogaster*

### Supplemental figure legends

#### Figure S1: *for<sup>HR</sup>* alleles, and generation of the *for<sup>0</sup>* and *for<sup>dup</sup>* alleles.

**A)** Schematic of the episomal targeting construct, that likely failed to linearize, aligned to regions of homology at the *foraging* locus. **B)** Schematic of *for<sup>HR4</sup>* and *for<sup>HR1</sup>* alleles and the recombination event that generated the *for<sup>0</sup>* and *for<sup>dup</sup>* alleles. The episomal element integrated into the regions of homology at either end of the locus. This generated a duplication of the homology regions. The *loxP* sites were used to delete the *foraging* locus. The resulting *for<sup>0</sup>* allele was a clean deletion with only *loxP* and *attP* sites remaining. The resulting *for<sup>dup</sup>* allele contained two wild type copies of the *foraging* gene, as well as a 20kb segment between the *foraging* genes containing the duplicated homology regions in the *for<sup>HR1</sup>* and *for<sup>HR4</sup>* alleles.

**Figure S2: Verification of the *for<sup>0</sup>* null allele.** **A)** Schematic of the *foraging* locus with the annotated homology arms (HA1, HA2, tan boxes) and primers that bind outside these homology regions (nullF, nullR, green triangles). These primers span a 45kb region in the wild type locus. **B)** Schematic of the *for<sup>0</sup>* null allele with the homology arms and primers annotated. These primers span a 10.7kb region in the *for<sup>0</sup>* allele. **C)** *in-silico* gel electrophoresis of undigested and digested PCR product spanning the *for<sup>0</sup>* allele. **D)**

Gel electrophoresis of undigested and digested PCR product spanning the *for*<sup>0</sup> allele. Restriction enzymes are labelled above the gels. The digestion patterns match the *in-silico* predictions. Sequencing of this 10.7kb PCR product confirmed the authenticity of the allele (data not shown).

**Figure S3: Construction and verification of the *for*<sup>BAC</sup> construct.**

**A)** Schematic of the p(attlox) recombineering BAC. We redesigned the P[acman] BAC (Venken *et al.*, 2006) to include a *loxP* sequence and altered the syntony of the *attB* sequence and multiple cloning site. **B)** Homology arms flanking the *foraging* gene were cloned into the P(attlox) vector to make pGAP<sup>for</sup>. These homology arms were designed to correspond to the breakpoints of the *for*<sup>0</sup> null allele. **C)** CH321-64J02 BAC used as the source for the *foraging* sequence. This BAC contained a  *copia*  transposable element within the *foraging* gene. We removed the  *copia*  sequence using the galk selection technique (Warming *et al.*, 2005). **D)** Once the  *copia*  element was removed, pGAP<sup>for</sup> was used to isolate the *foraging* gene from the CH321-64J02- *copia*  BAC to generate the P(attlox)<sup>for</sup> BAC. **E)** *in-silico* and **F)** *in-vitro* gel electrophoresis of restriction digestions of the P(attlox)<sup>for</sup> BAC.

**Figure S4: Effects of hemizygous rover and sitter larvae on path length, food intake and fat levels.**

**A)** Larval path length of heterozygous *for*<sup>R</sup>/*for*<sup>0</sup>, and *for*<sup>S</sup>/*for*<sup>0</sup> individuals (t = 7.3133, df = 55.44, p = 1.108e-09). **B)** Larval food intake of heterozygous *for*<sup>R</sup>/*for*<sup>0</sup>, *for*<sup>S</sup>/*for*<sup>0</sup>, and

homozygous *for*<sup>0</sup> individuals (a.u., arbitrary fluorescence units;  $t = -5.1479$ ,  $df = 122.8$ ,  $p\text{-value} = 1.015e-06$ ). **C**) Larval triglyceride levels of heterozygous *for*<sup>R</sup>/*for*<sup>0</sup>, *for*<sup>S</sup>/*for*<sup>0</sup> and homozygous *for*<sup>0</sup> individuals ( $t = -3.4632$ ,  $df = 29.43$ ,  $p\text{-value} = 0.001656$ ).

**Figure S5: *foraging* gene dosage and allelic contributions to *foraging* gene expression in whole larvae**

Expression of *foraging* mRNA of homozygous *for*<sup>R</sup>, *for*<sup>S</sup>, heterozygous *for*<sup>R</sup>/*for*<sup>S</sup> heterozygous, *for*<sup>R</sup>/*for*<sup>0</sup>, and *for*<sup>S</sup>/*for*<sup>0</sup>, whole larvae homogenates amplifying each promoter region and the common coding region. **A**) Schematic of the *foraging* (as in Figure 1). Promoter-specific regions targeted for qPCR identified by the upper vertex of the light blue triangles. **B**) *pr1*-specific ( $F_{(4,10)}=66.4$ ,  $p=3.7e-7$ ), **C**) *pr2*-specific ( $F_{(4,10)}=22.99$ ,  $p=5.0e-5$ ), **D**) *pr3* ( $F_{(4,10)}=25.28$ ,  $p=3.3e-5$ ), and **E**) *pr4*-specific ( $F_{(4,10)}=18.99$ ,  $p=1.2e-4$ ), and **F**) common coding ( $F_{(4,10)}=53.28$ ,  $p=1.0e-6$ ) expression of regions of *foraging* quantified RT-qPCR. Due to the gene structure, *pr3* is not specific and amplifies a sub-set of *pr1* and *pr2*, as well. **B-F**) Individual data points are plotted ( $n=3/\text{genotype}$ ; triangle, square, circle) with a bar representing the mean of the 3 samples. All the  $\Delta\Delta\text{Ct}$ 's were calculated relative to the mean *for*<sup>S</sup>  $\Delta\text{Ct}$  for the common coding region in **F**. (\*\*\*,  $p<0.001$ ; \*\*,  $p<0.01$ ; \*,  $p<0.05$ ;  $p\text{-values}$  are relative to *for*<sup>S</sup>).
