# Supplementary material
Source: PubMed Central journal article supplement (PMC5289850)
Supplement: 761TableS1.pdf [file 761TableS1.pdf]

**Table S1: Primer names and sequences used in this study.**

| <b>Primer Name</b> | <b>Primer Sequence</b>                                                                                   |
|--------------------|----------------------------------------------------------------------------------------------------------|
| comRT-R.3          | TAGAAGCGGGTGGTGCTGTCG                                                                                    |
| 43S                | T TACTGGTCGCTGGGAGTG                                                                                     |
| TSS1-F             | GGTGTGCGGTTGTCGTTTGTGCG                                                                                  |
| TSS2-F             | GGCACGCAAACGTACATTTTCG                                                                                   |
| TSS3-F             | AGTTCCTCAACCGACTTGGGTC                                                                                   |
| TSS4-F             | TGCGCTCGGTTGCGAAAAG                                                                                      |
| comORF3'-R         | TCAGAAGTCCTTGTCCCATCCAG                                                                                  |
| HA1-F              | CGTACGAAGCGATGAGCAATGGGCGAC                                                                              |
| HA1-R              | GGCGCGCCGGAGAGCGTAGGAGAGCCAG                                                                             |
| attP-F             | GGTACCTAGTACTGACGGACACAC                                                                                 |
| attP-R             | GCGGCCGCCCTGCAGGCTAGTCGCGCTCGCGCG                                                                        |
| HA2-F              | CCTGCAGGTCAATGGGTTTCTTCGTTG                                                                              |
| HA2-R              | GCGGCCGCTGGGCACACATGTCCTG                                                                                |
| attB-F             | GTCGACATAACTTCGTATAGCATACATTATACGAAGTTATGGCGCGCCCGG<br>GCCGCTTAATTAAGCGATCGCGATGTAGGTCACGGTCTCGAAGCCGCGG |
| attB-R             | GCATGCTCGACATGCCCGCCGTGACCG                                                                              |
| LA-F               | GGCGCGCCTCGCCTGCCGCTCCTTTC                                                                               |
| LA-R               | GCGGCCGCCAAGGCGTGCTATTTGC                                                                                |
| RA-F               | GCGGCCGCAAGGTCAAGGGCCGACA                                                                                |
| RA-R               | GCGATCGCAGCAATGGCCAGCAGTATC                                                                              |
| L-copia-F          | GAACTCTCTCTCACTCTCTCTC                                                                                   |
| L-copia-R          | GAATTCACITTCGGCTCTAAGGCGGA                                                                               |
| R-copia-F          | GGATCCGATCGTGCCAAAAATGATAAGATAAATC                                                                       |
| R-copia-R          | TTCTAAGACCAGGCAAATGGC                                                                                    |
| for-copia          | TTAAGGCTCAGGGTCTTTAAGCCCTTTTCTCCGCTTAGAGCCGAAAAGTGG<br>ATCGTGCCAAAAATGATAAGATAAATCACTAAAAGCTAGTAAAACAATA |
| 1433e-F            | ACCAACACACCCCATCCGTT                                                                                     |
| 1433e-R            | ATGGCATCATCGAAAGCGGC                                                                                     |
| act5c-F            | GCTGAGCGTGAAATCGTCCG                                                                                     |
| act5c-R            | GATGCCGCAAGCCTCCATTC                                                                                     |
| tub-F              | GGACGTCAACGCCGCTATTG                                                                                     |
| tub-R              | TTGGACAACATGCACACGGC                                                                                     |
| com2-F             | CTCCATTCACGGGCTCGGAT                                                                                     |
| com2-R             | ATCTCGCTGATTCCCCCAGC                                                                                     |
| pr1-F              | TTTGTCGCGATCGTGCTTGG                                                                                     |
| pr1-R              | ACCACCGAACTAAATGGCGATG                                                                                   |
| pr2-F              | GGATGTCGCTAGCACGCAAAC                                                                                    |
| pr2-R              | TAACACACGCACAAGCACACC                                                                                    |
| pr4-F              | GCGCTCGGTTGCGAAAAGTG                                                                                     |
| pr4-R              | CCAAACACGAAGTGGGGGAGT                                                                                    |
| P1-F               | ACAGCAATGCACCACACAGC                                                                                     |
| P1-R               | TTGGCCTCGCTCCTGGTATC                                                                                     |
| P1/3-F             | TCTGGTGGGTGGCATTGTGA                                                                                     |
| P1/3-R             | TGTGGGTCAGCACATCCGAG                                                                                     |
