# Supplementary material
Source: PubMed Central journal article supplement (PMC5289850)

**A**

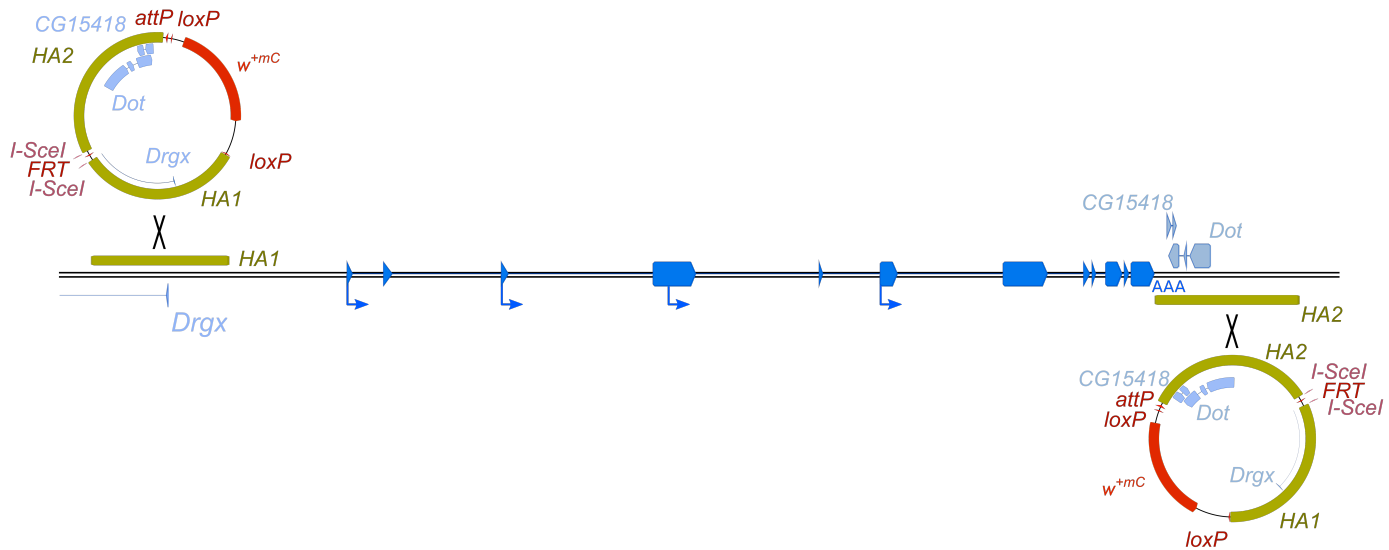

**B**

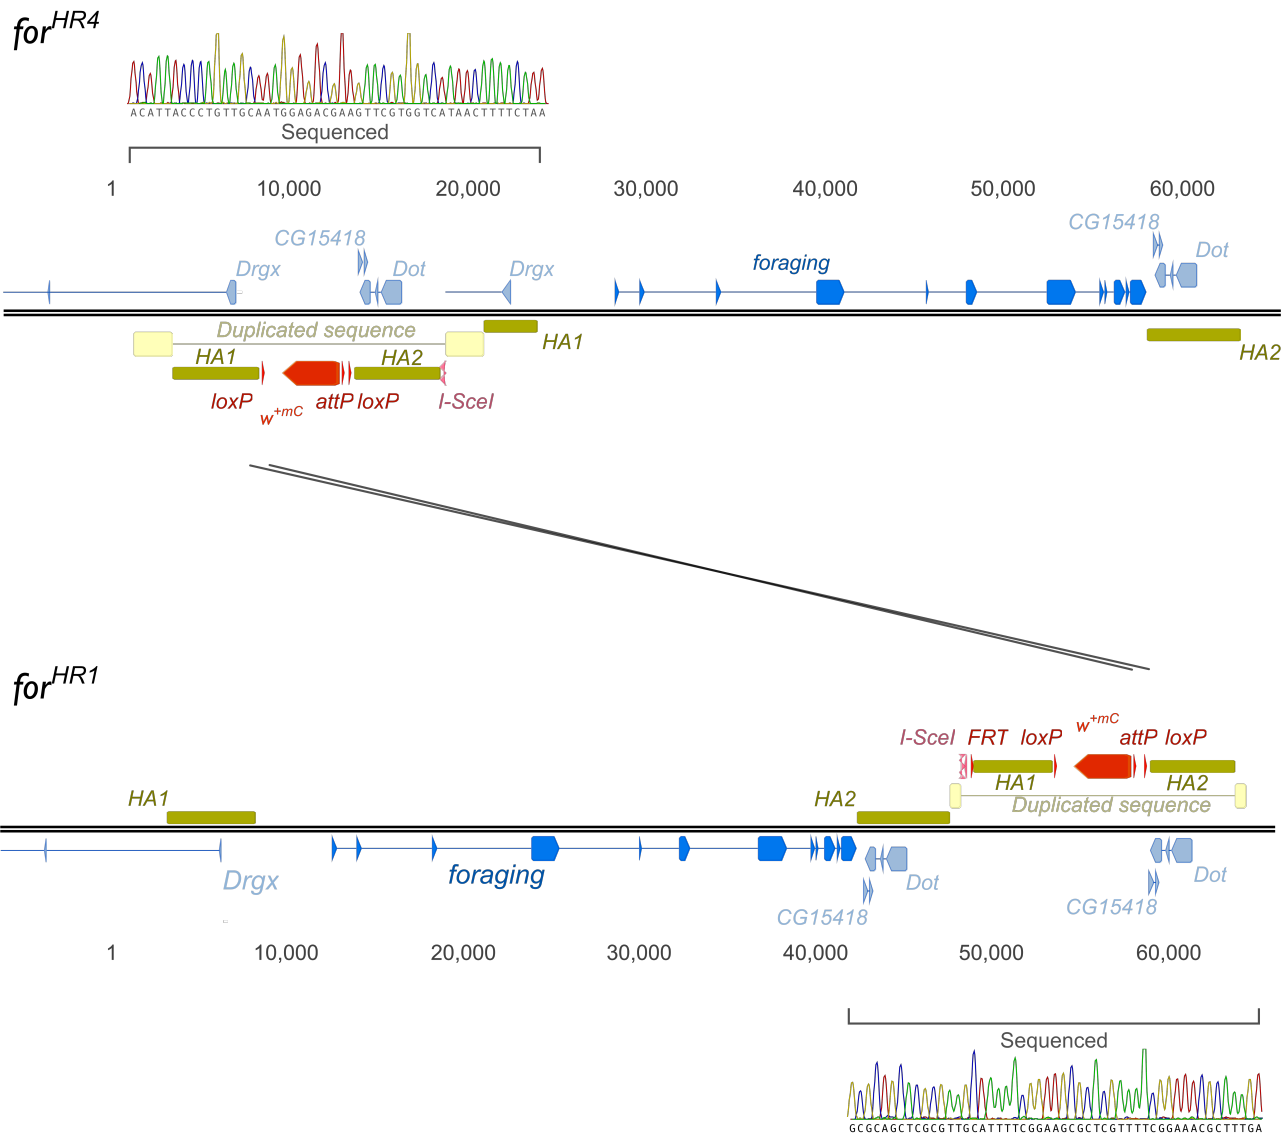

Supplement: 761FigureS1.pdf [file 761FigureS1.pdf]

**A**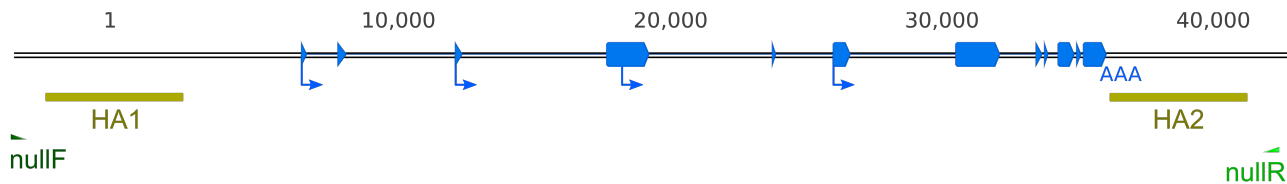**B**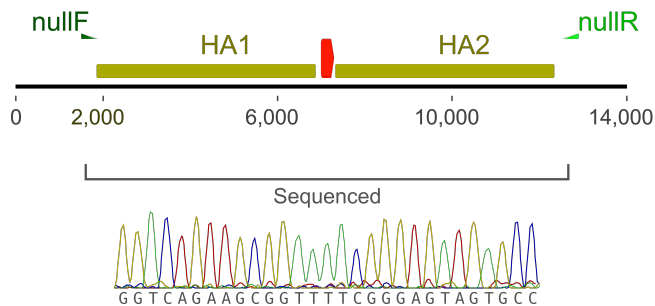**C**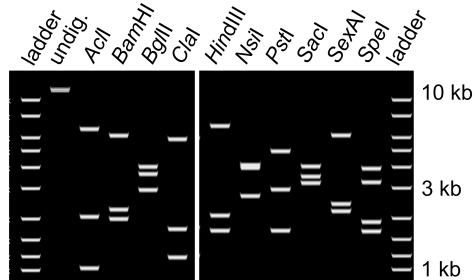**D**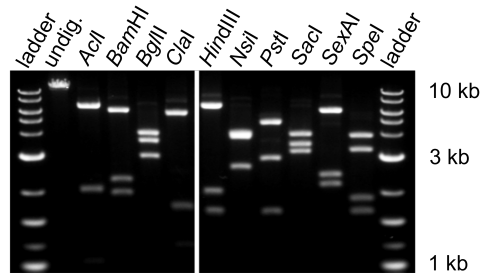

Supplement: 761FigureS2.pdf [file 761FigureS2.pdf]

A

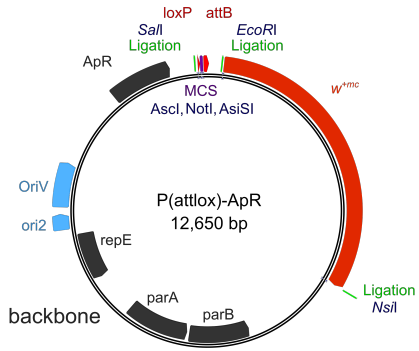

B

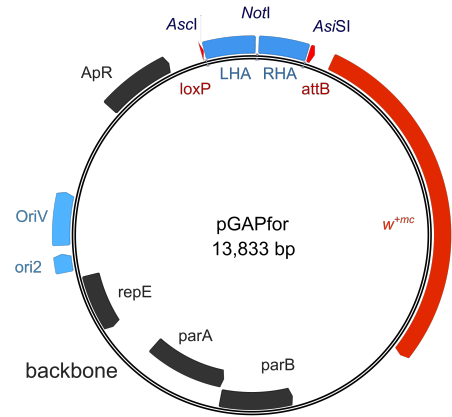

C

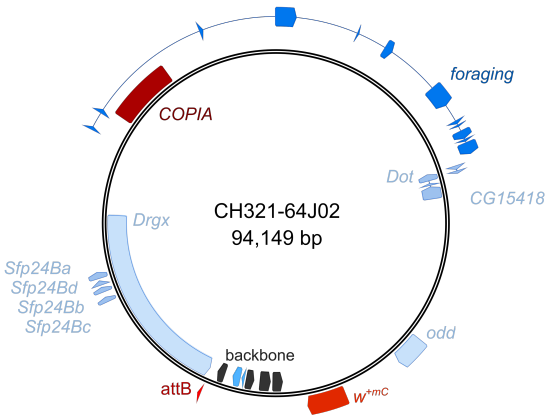

D

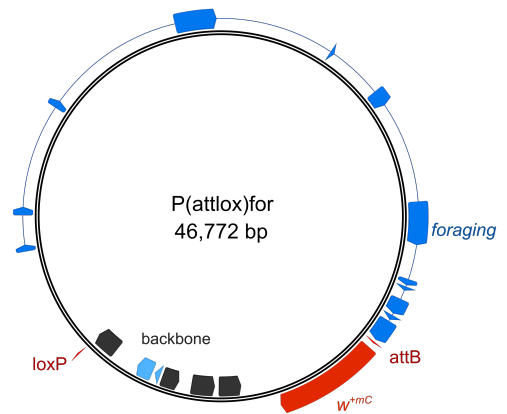

E

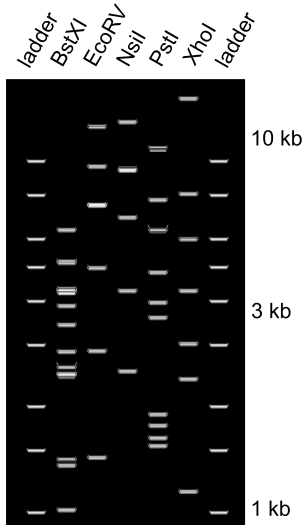

F

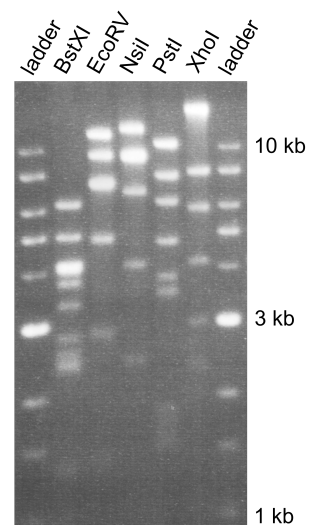

Supplement: 761FigureS3.pdf [file 761FigureS3.pdf]

**A**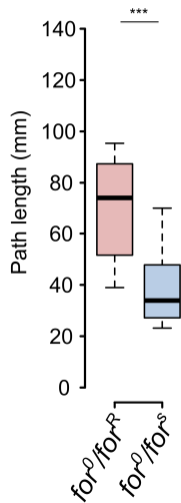**B**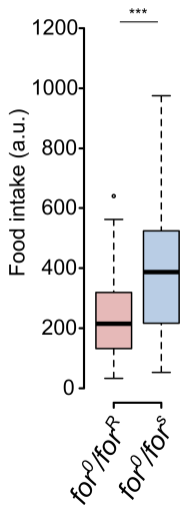**C**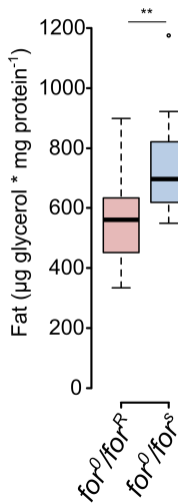

Supplement: 761FigureS4.pdf [file 761FigureS4.pdf]

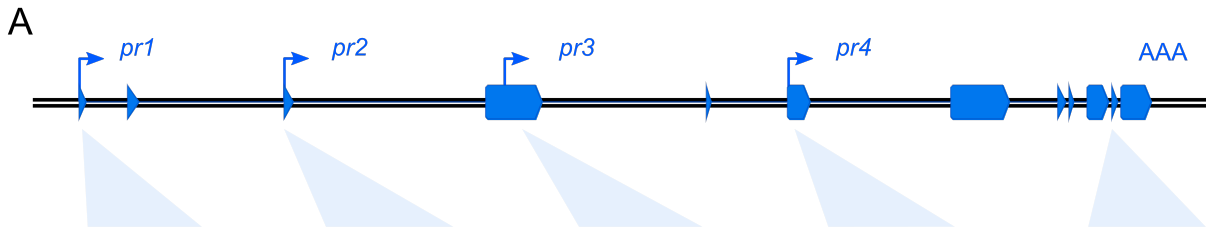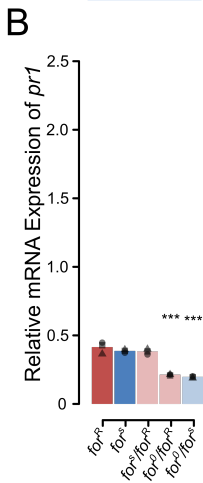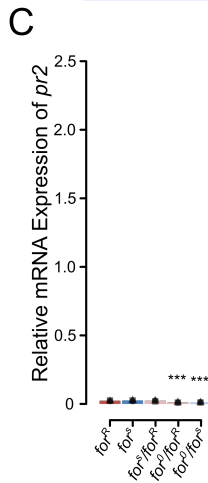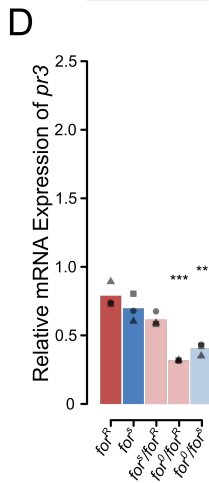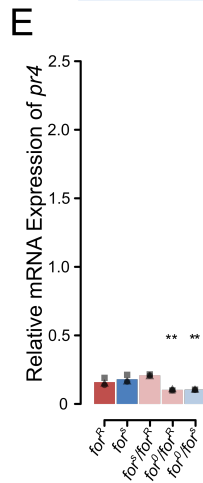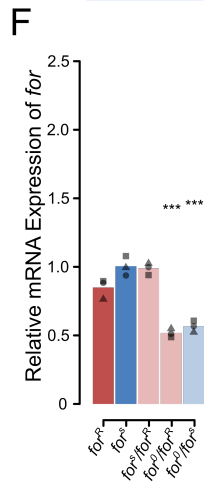

Supplement: 761FigureS5.pdf [file 761FigureS5.pdf]
